# Supplementary material for: Benzotriazole-Mediated Synthesis and Antibacterial Activity of Novel N-Acylcephalexins
Source: PubMed Central journal article supplement (PMC5064239; doi:10.3390/scipharm84030484), 2016-04-13

# Supplementary Materials: Benzotriazole-Mediated Synthesis and Preliminary Antibacterial Activity of Novel *N*-Acylcephalexins

Khalid A. Agha, Nader E. Abo-Dya, Tarek S. Ibrahim, Eatedal H. Abdel-Aal and Wael A. Hegazy

Figure S1. <sup>1</sup>H and <sup>13</sup>C NMR spectra of compounds 7d–j.

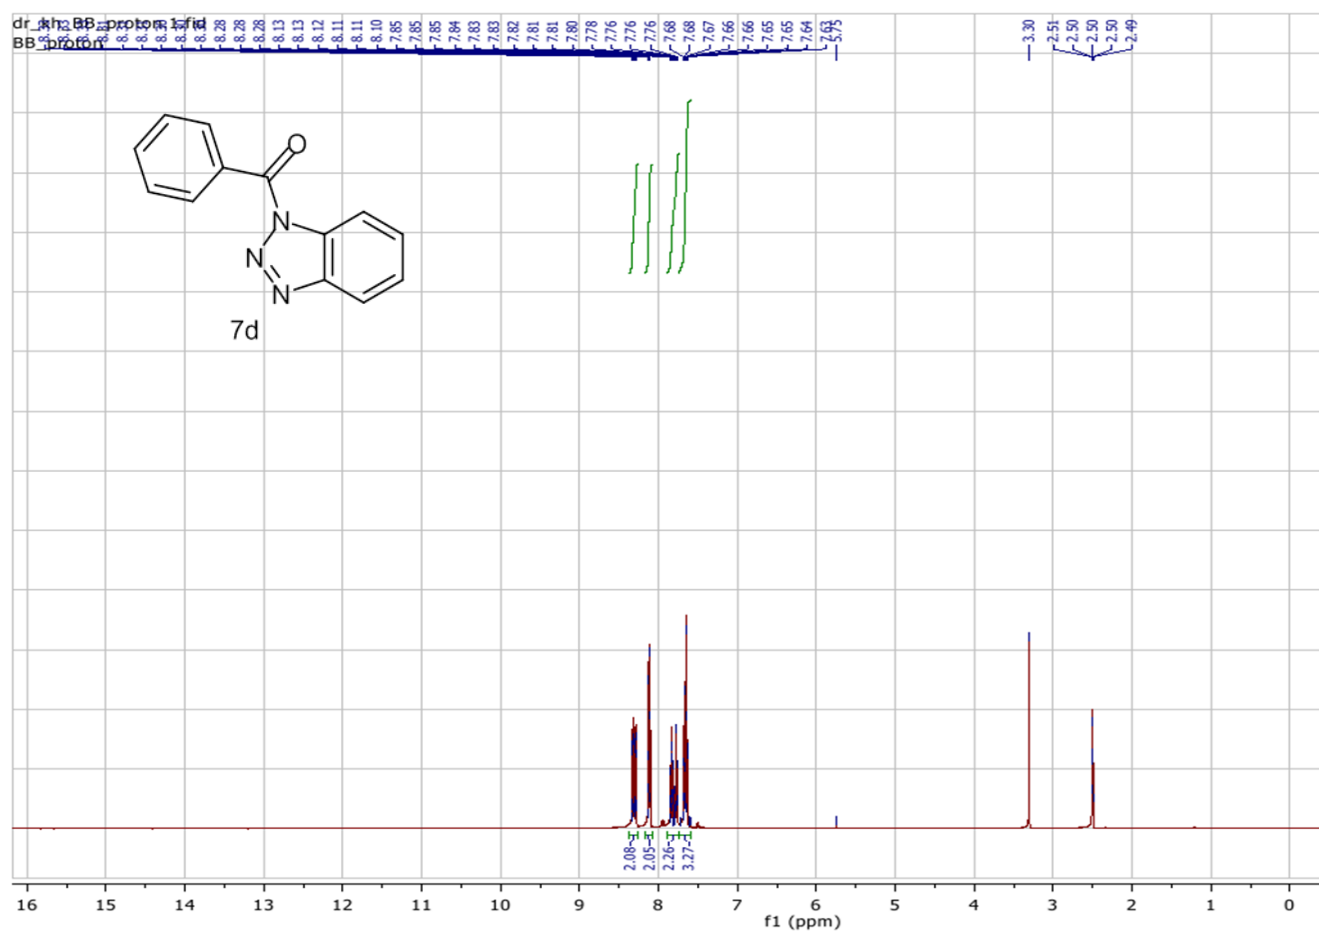

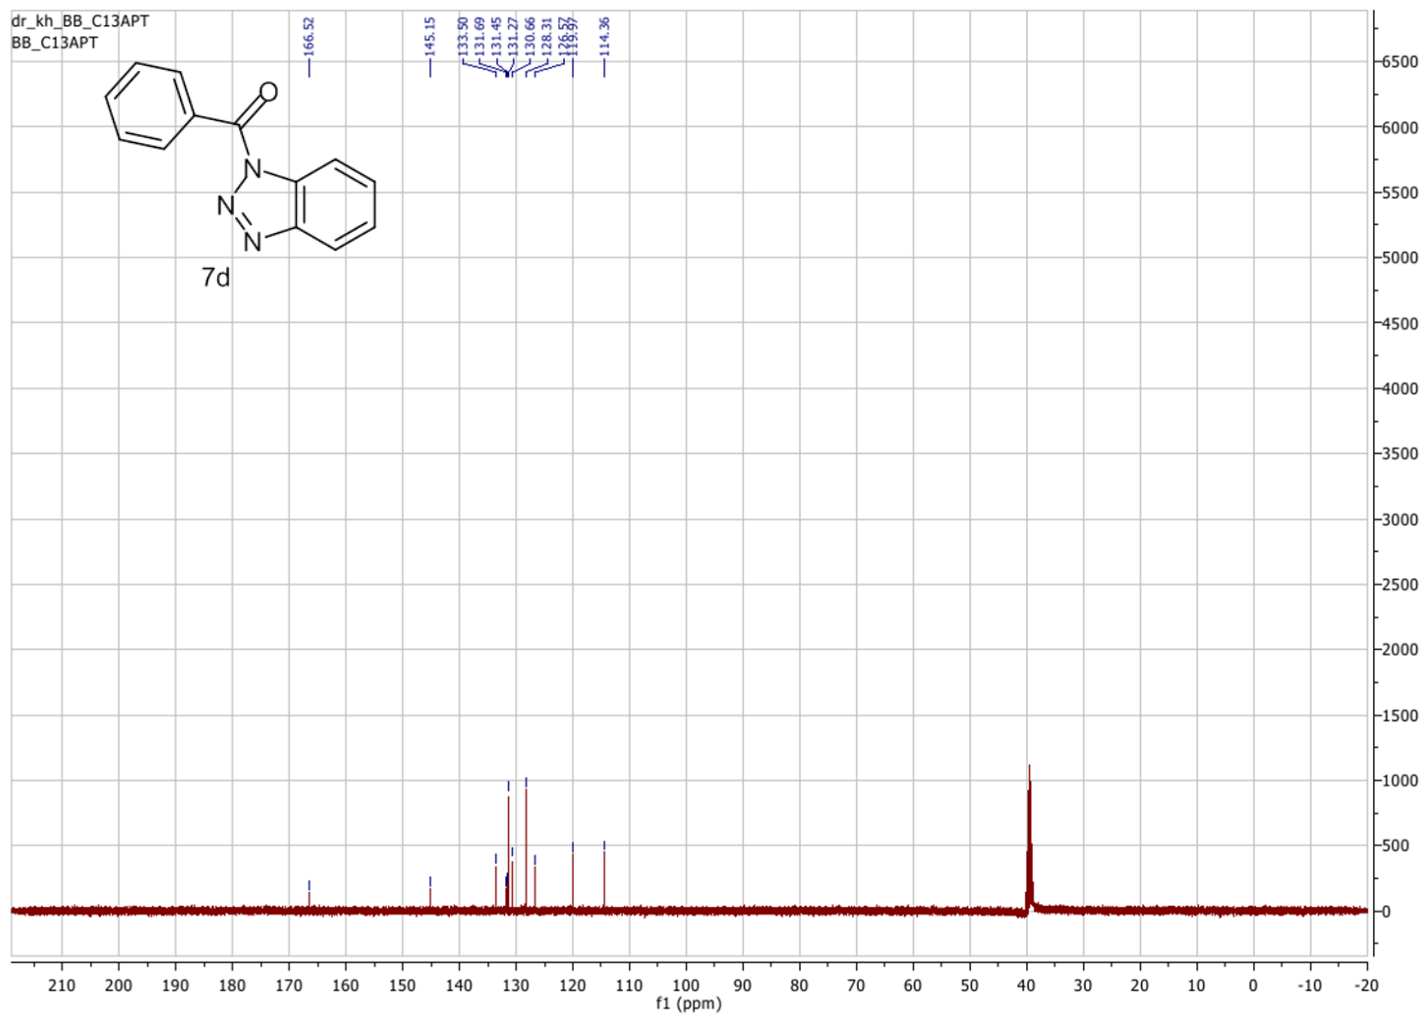

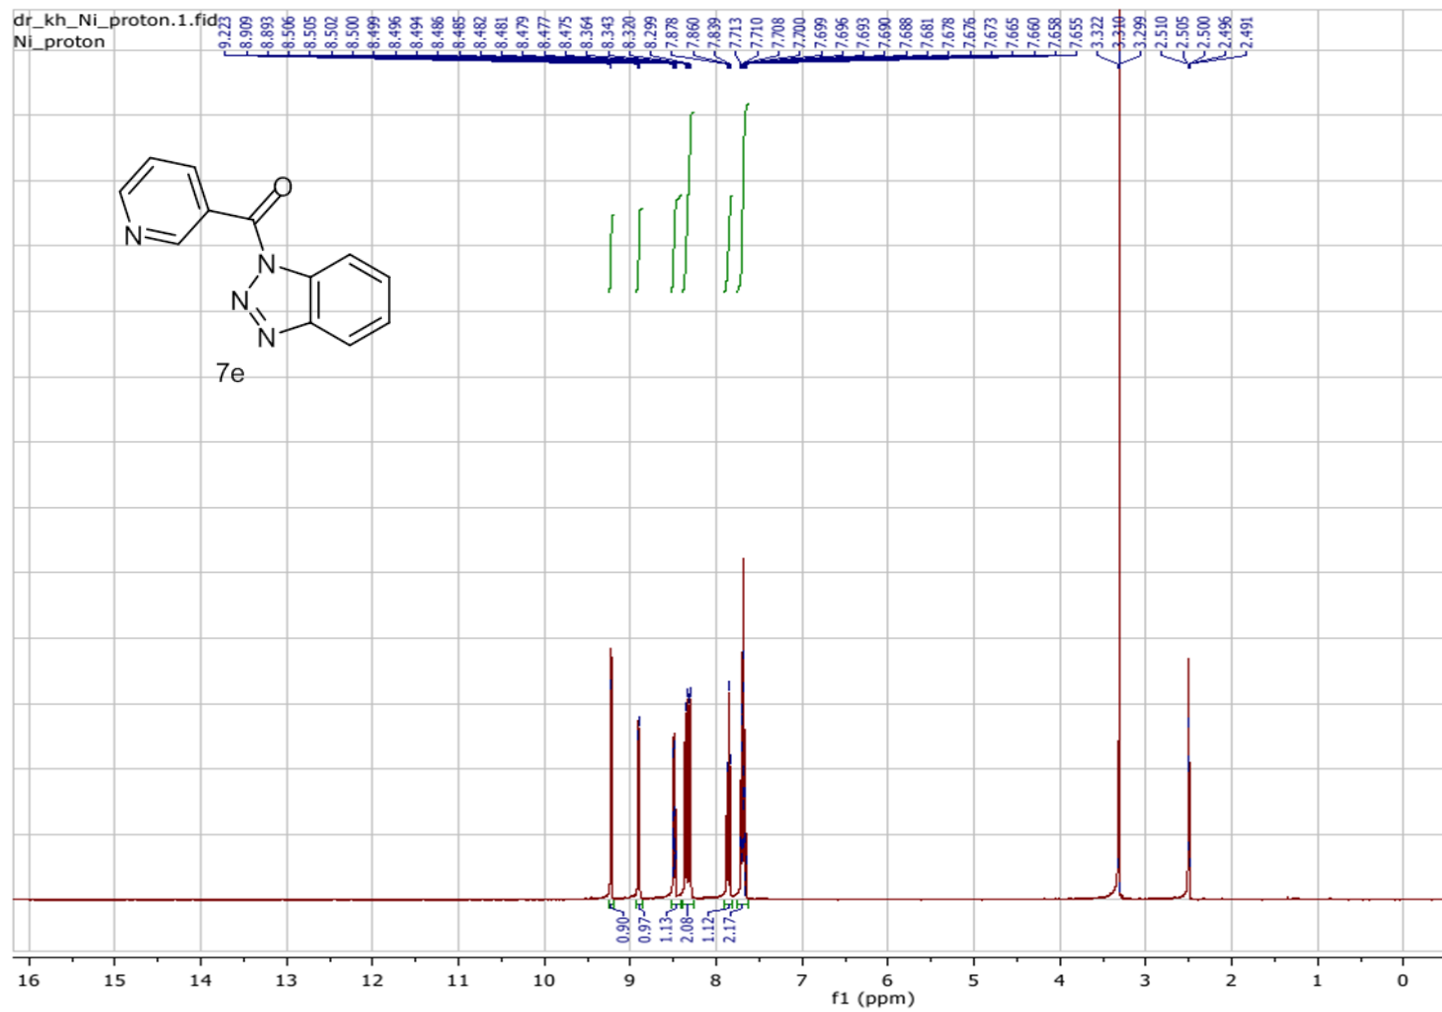

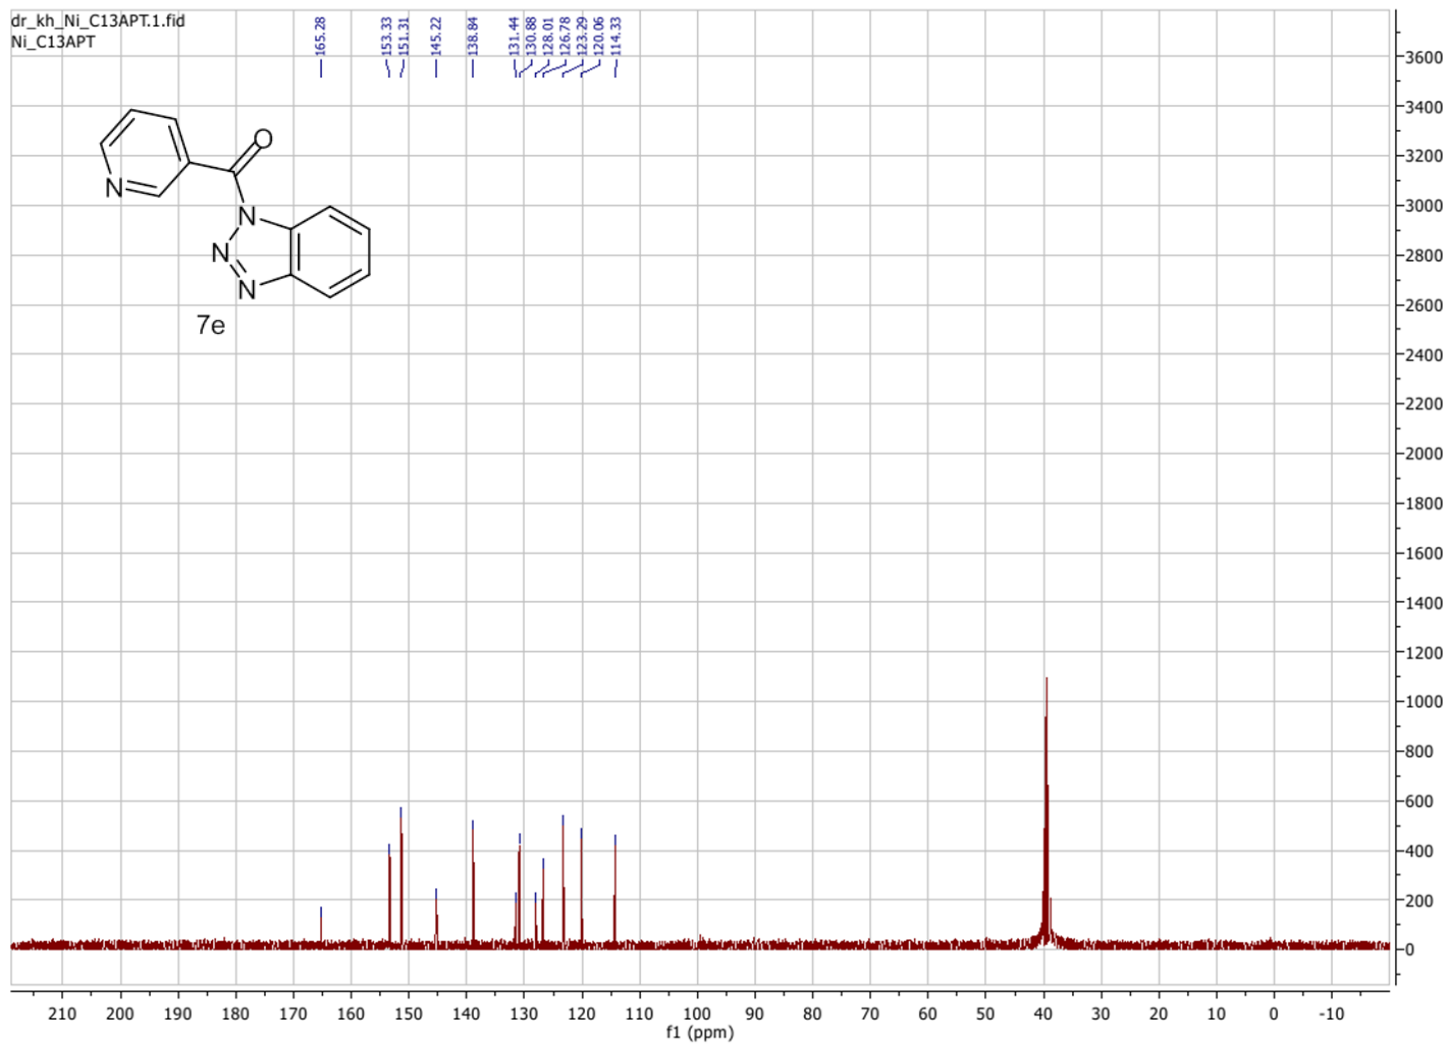

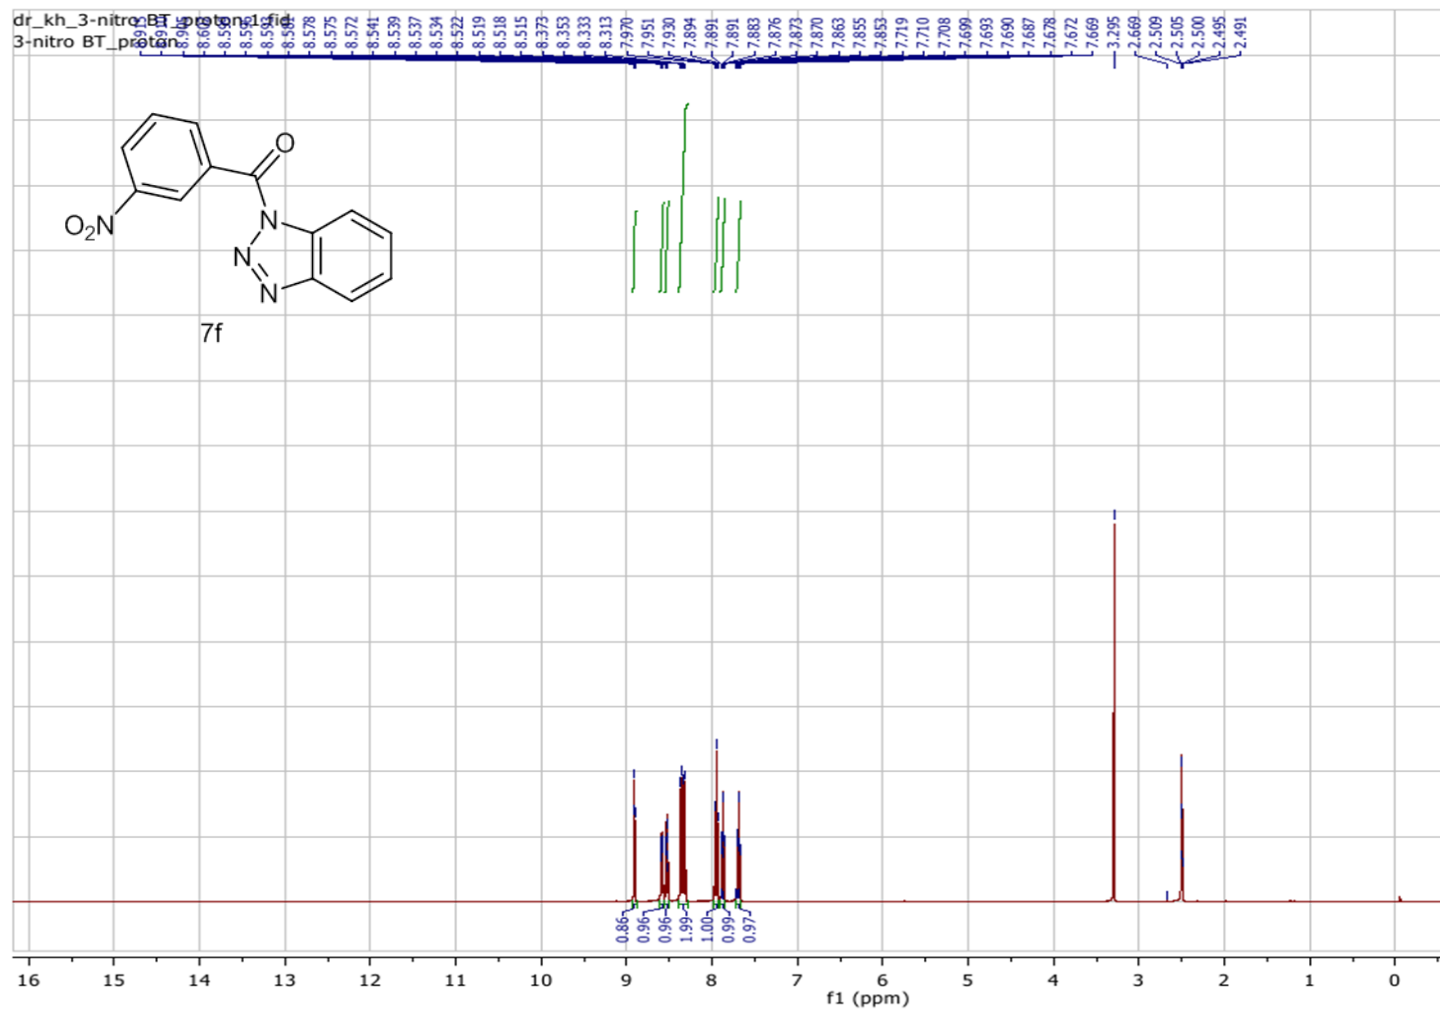

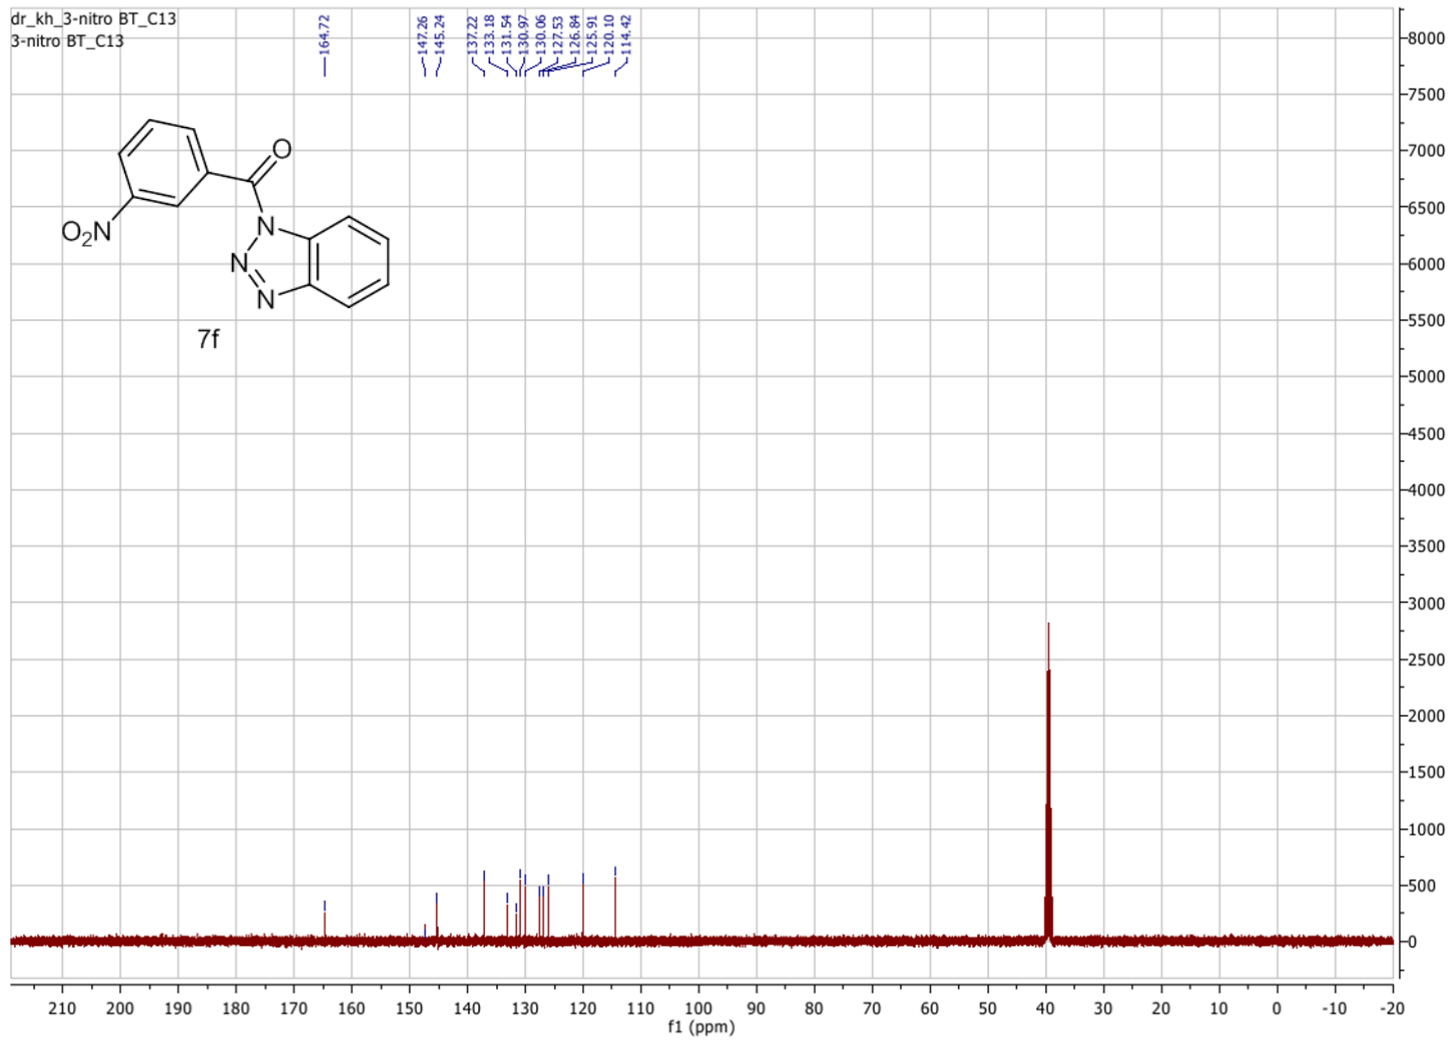

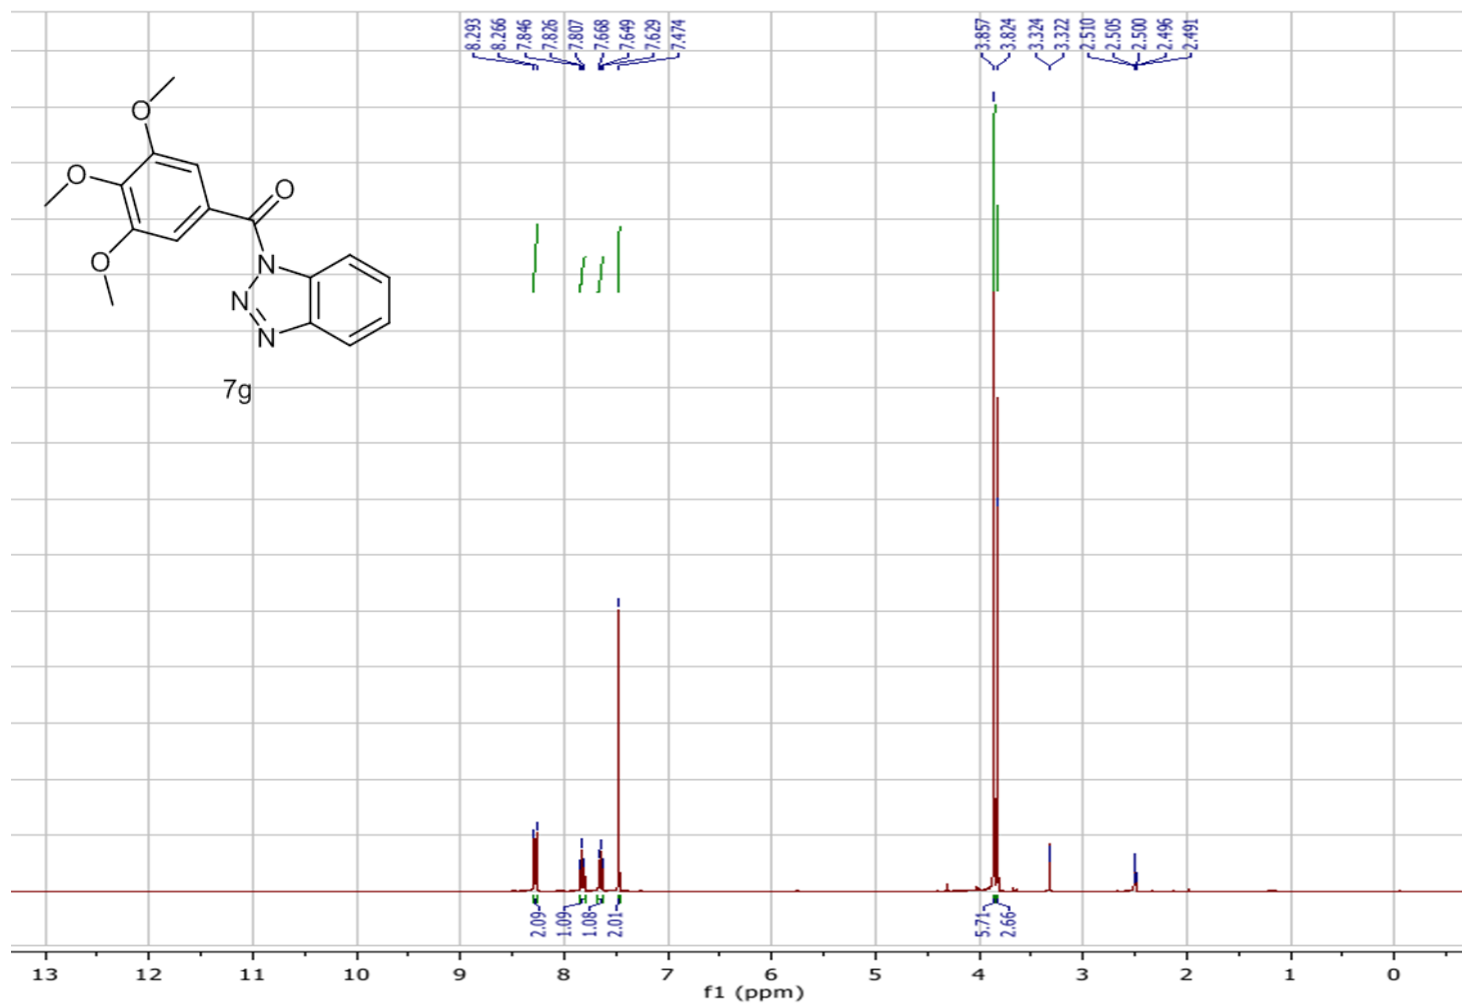

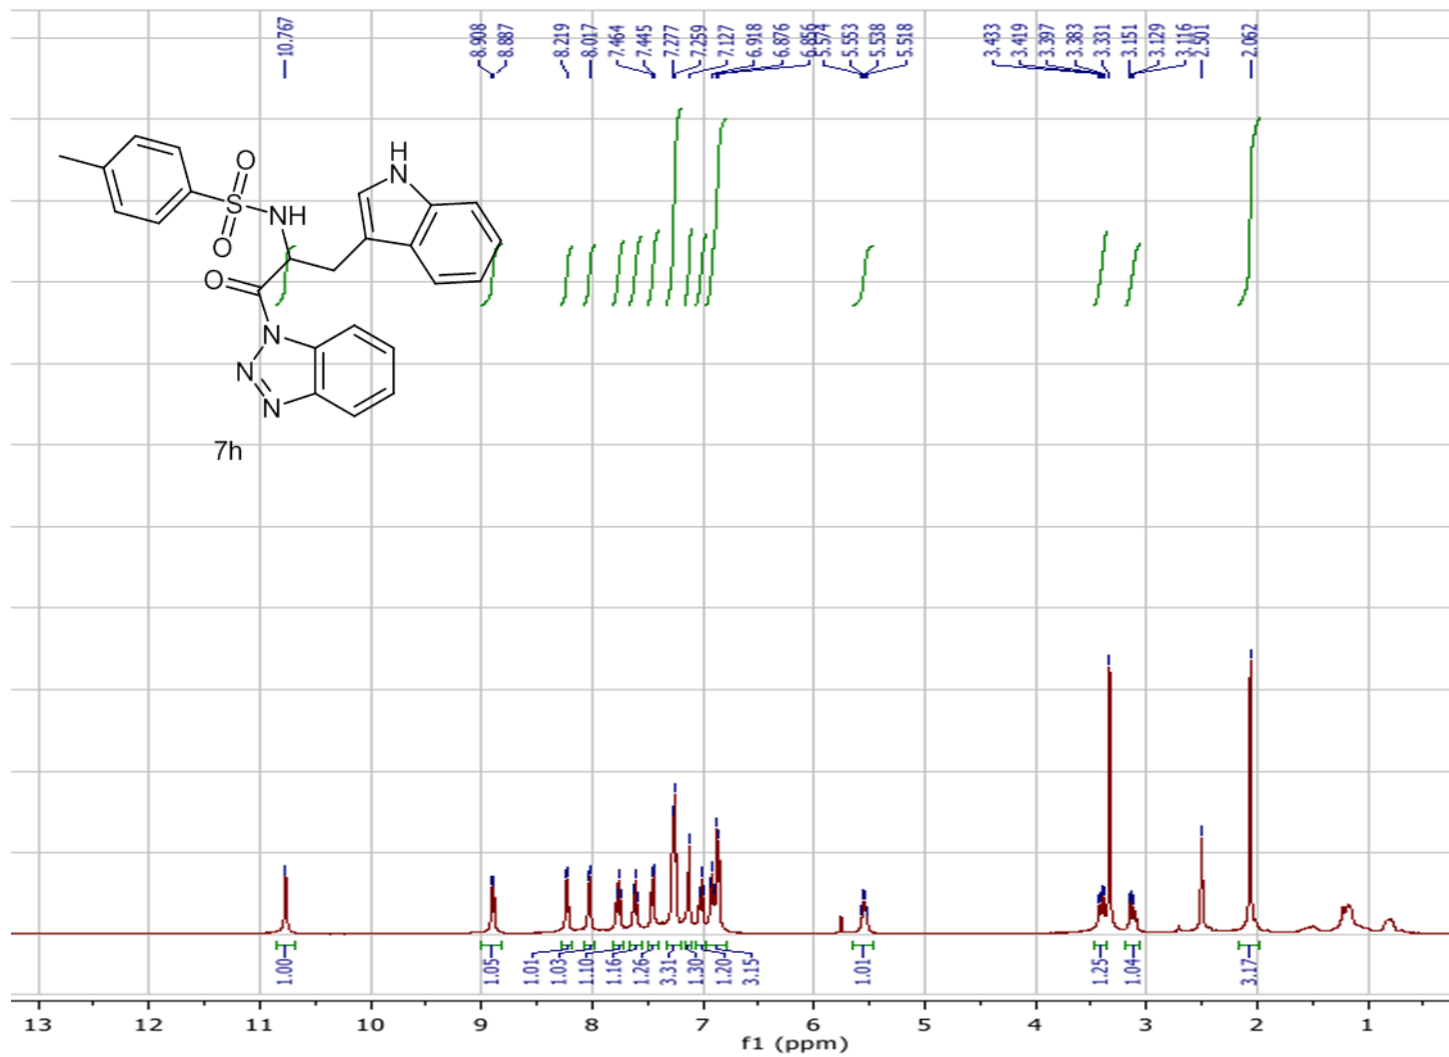



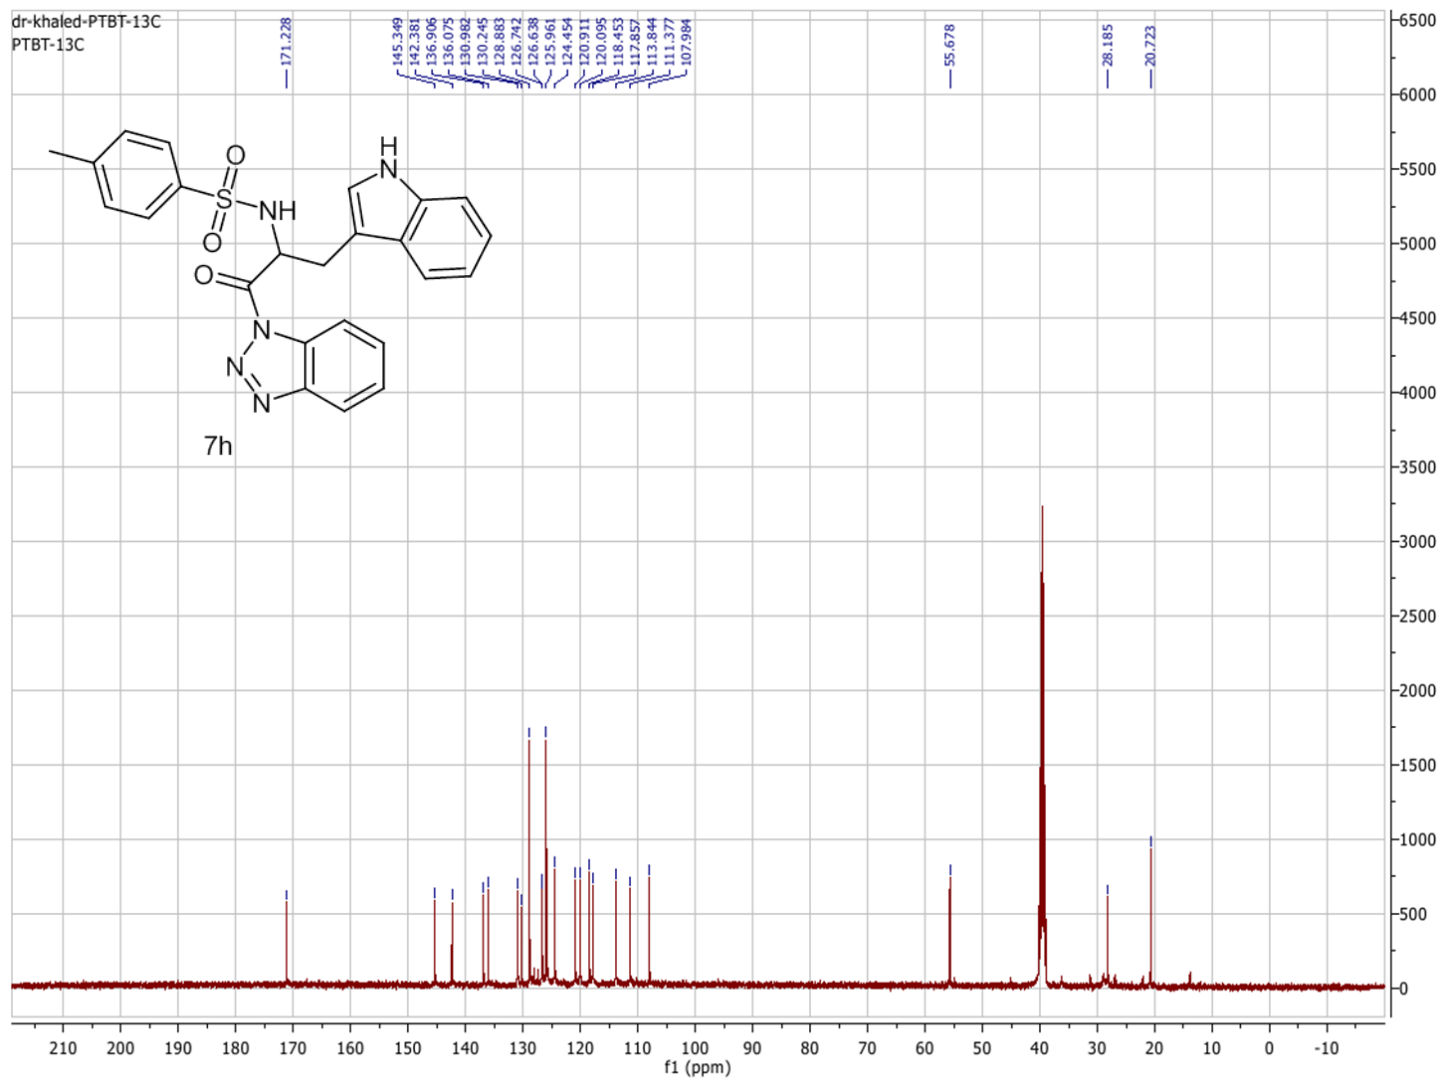

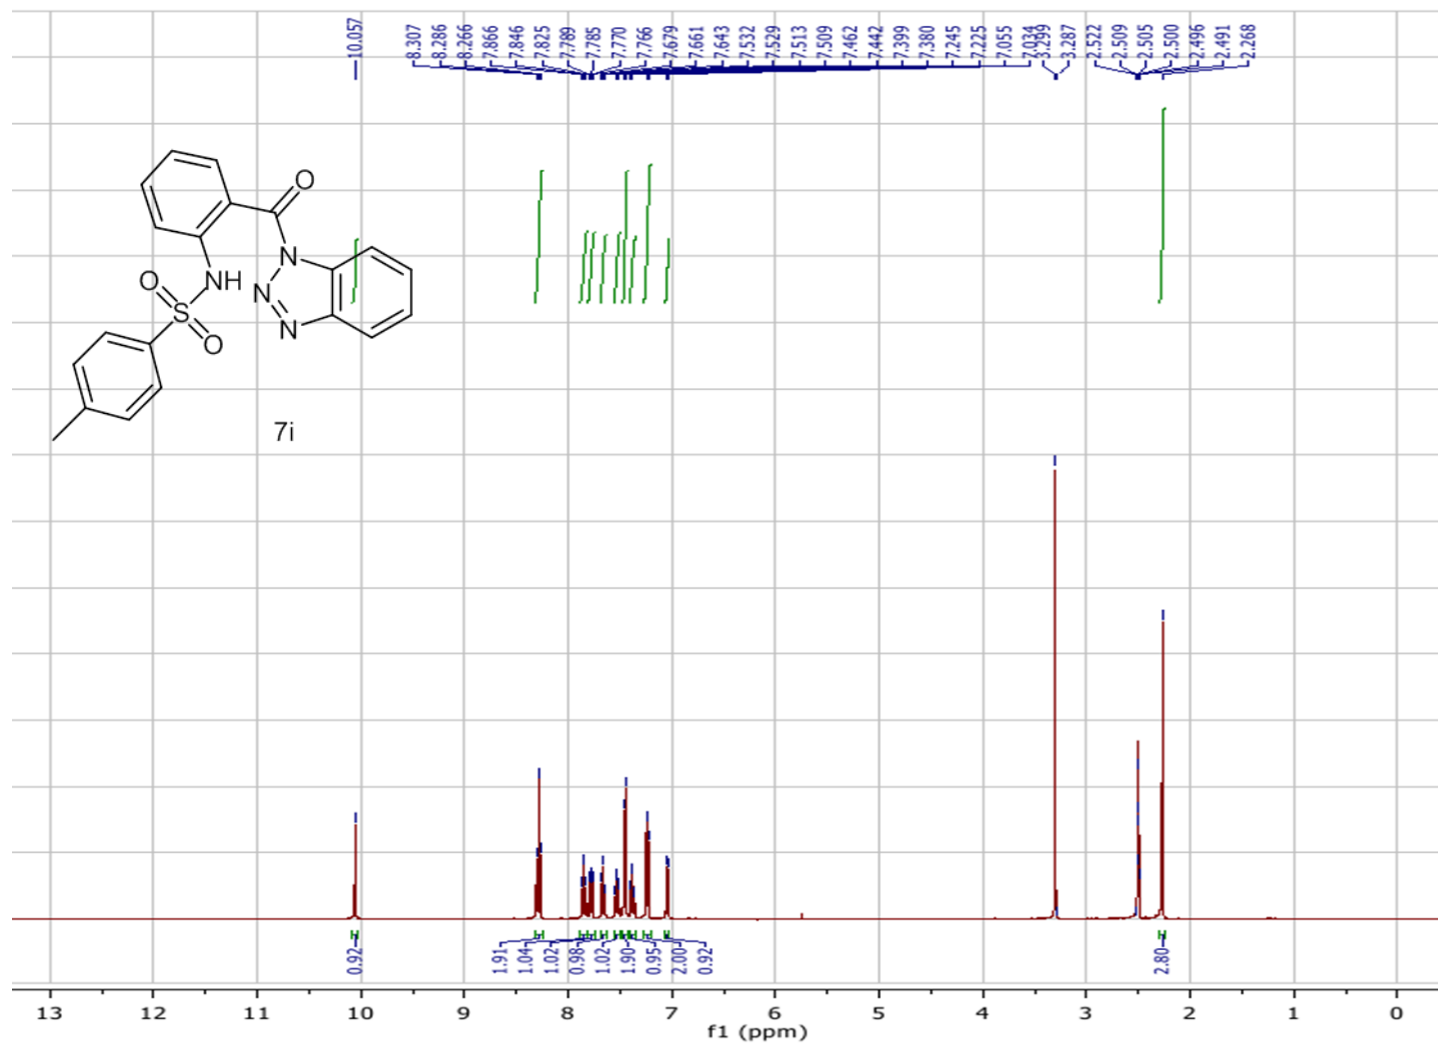

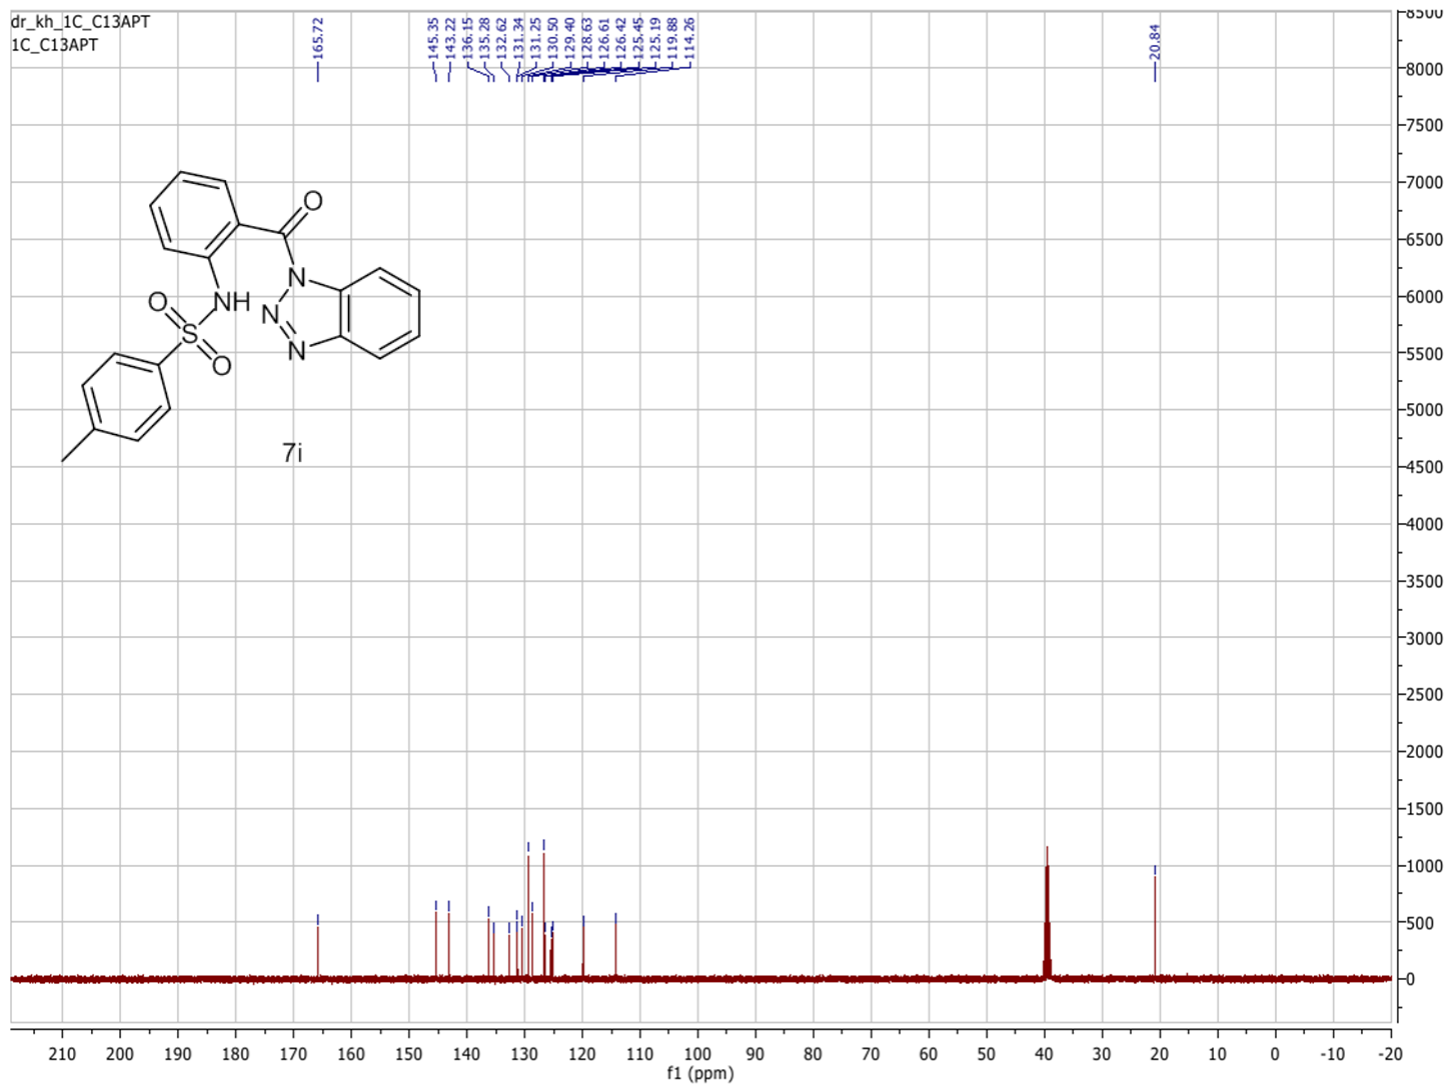

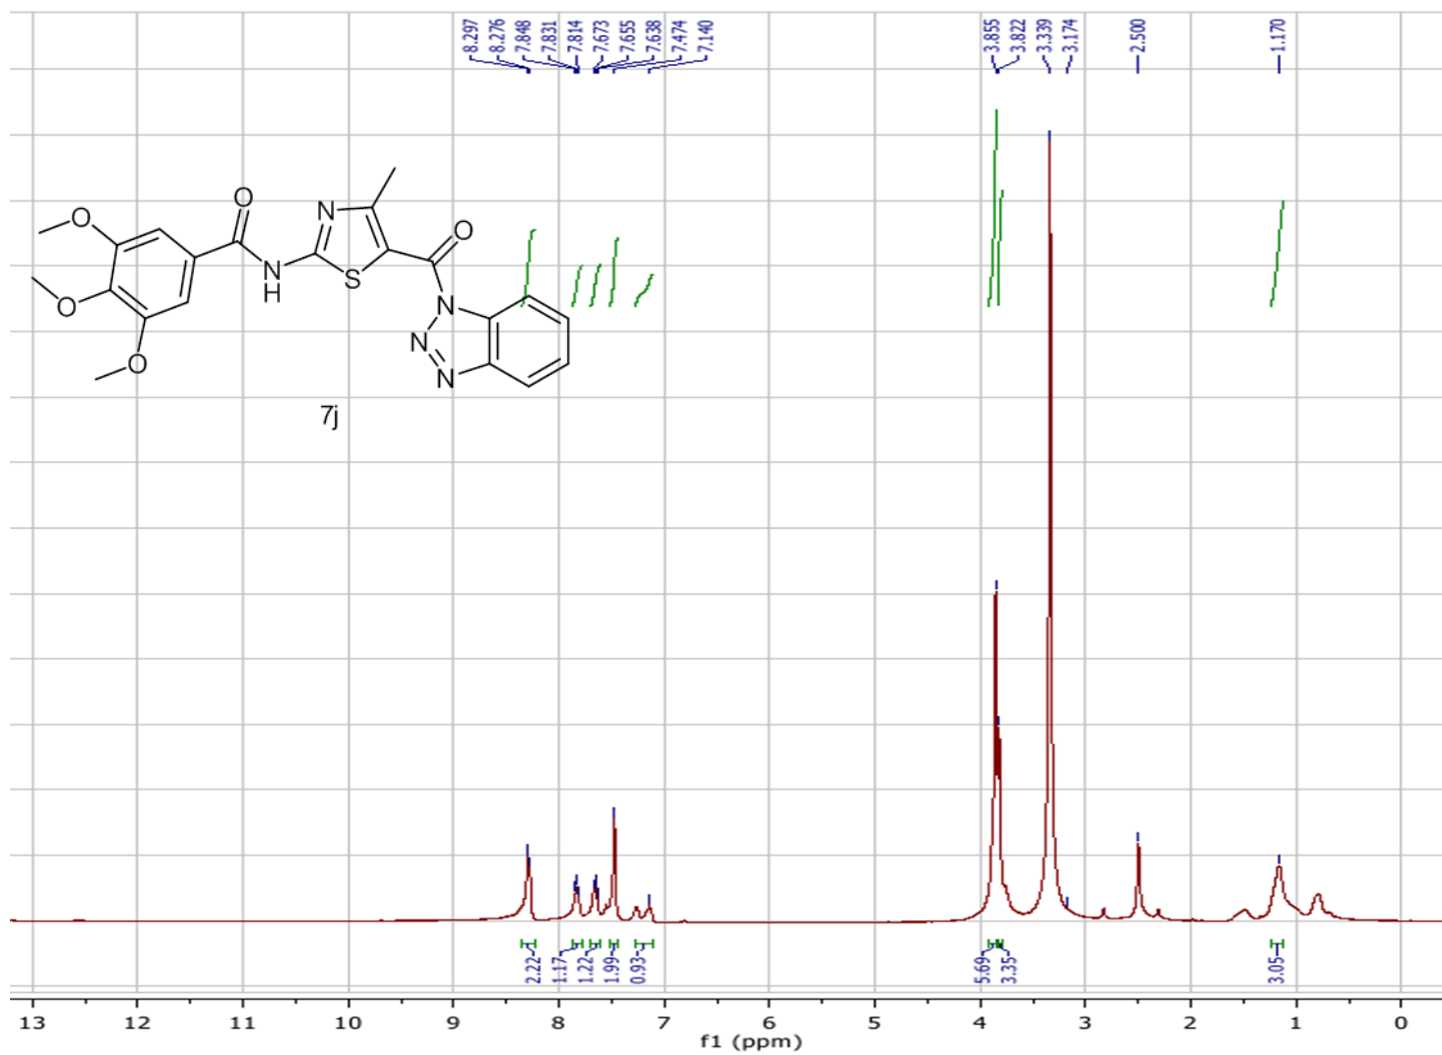

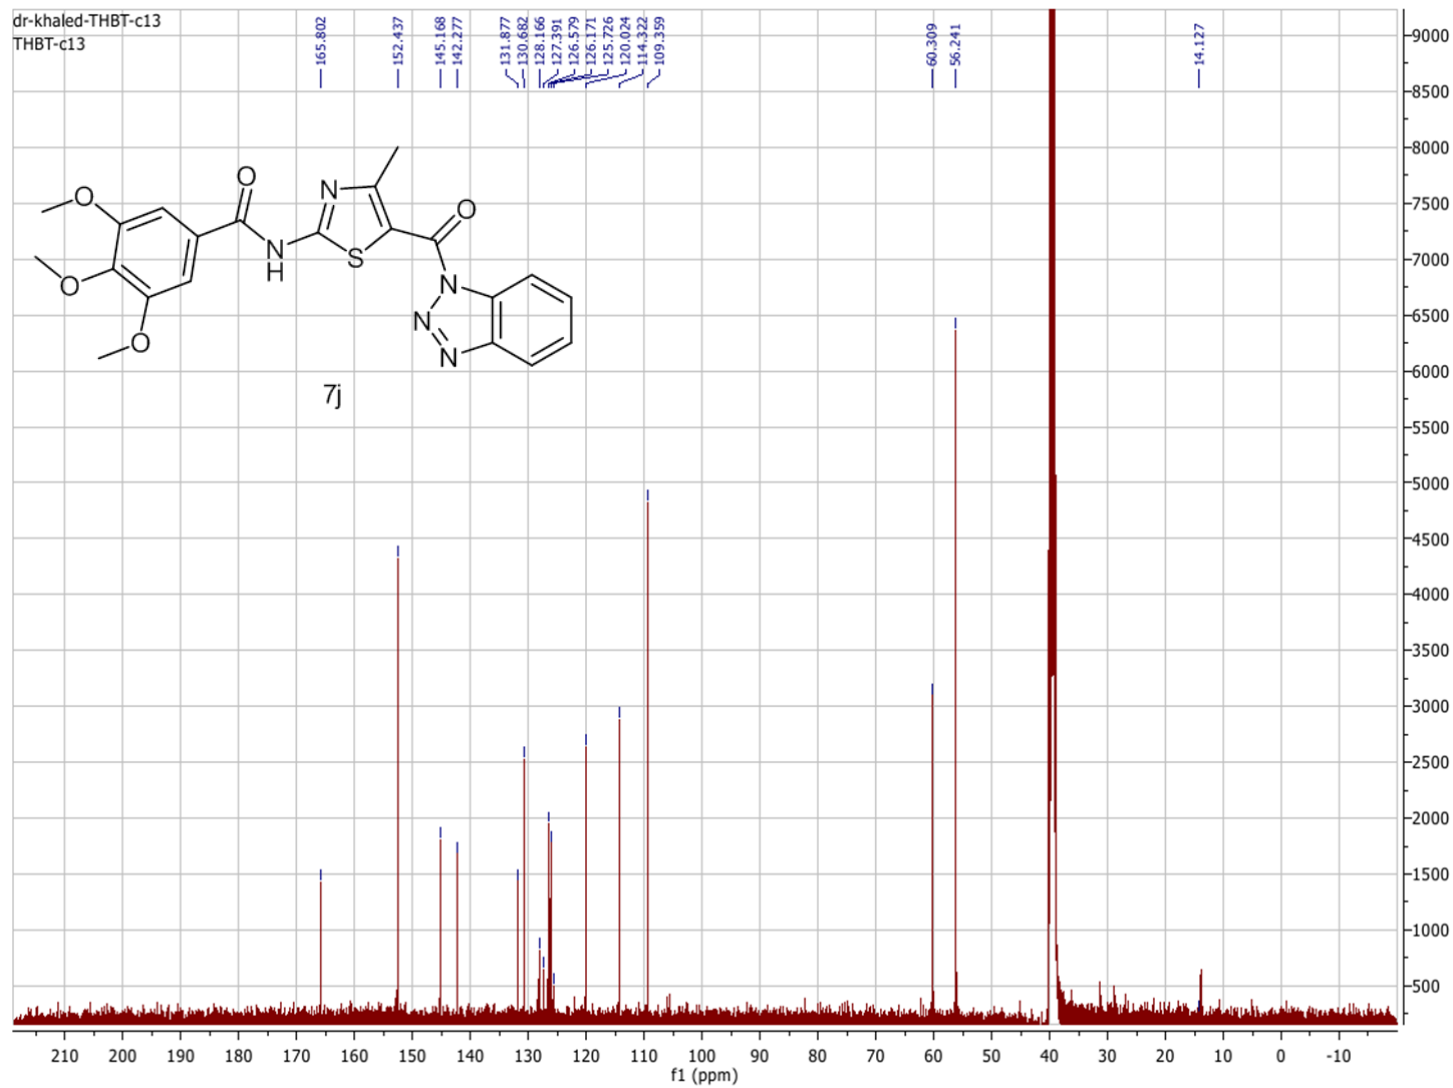

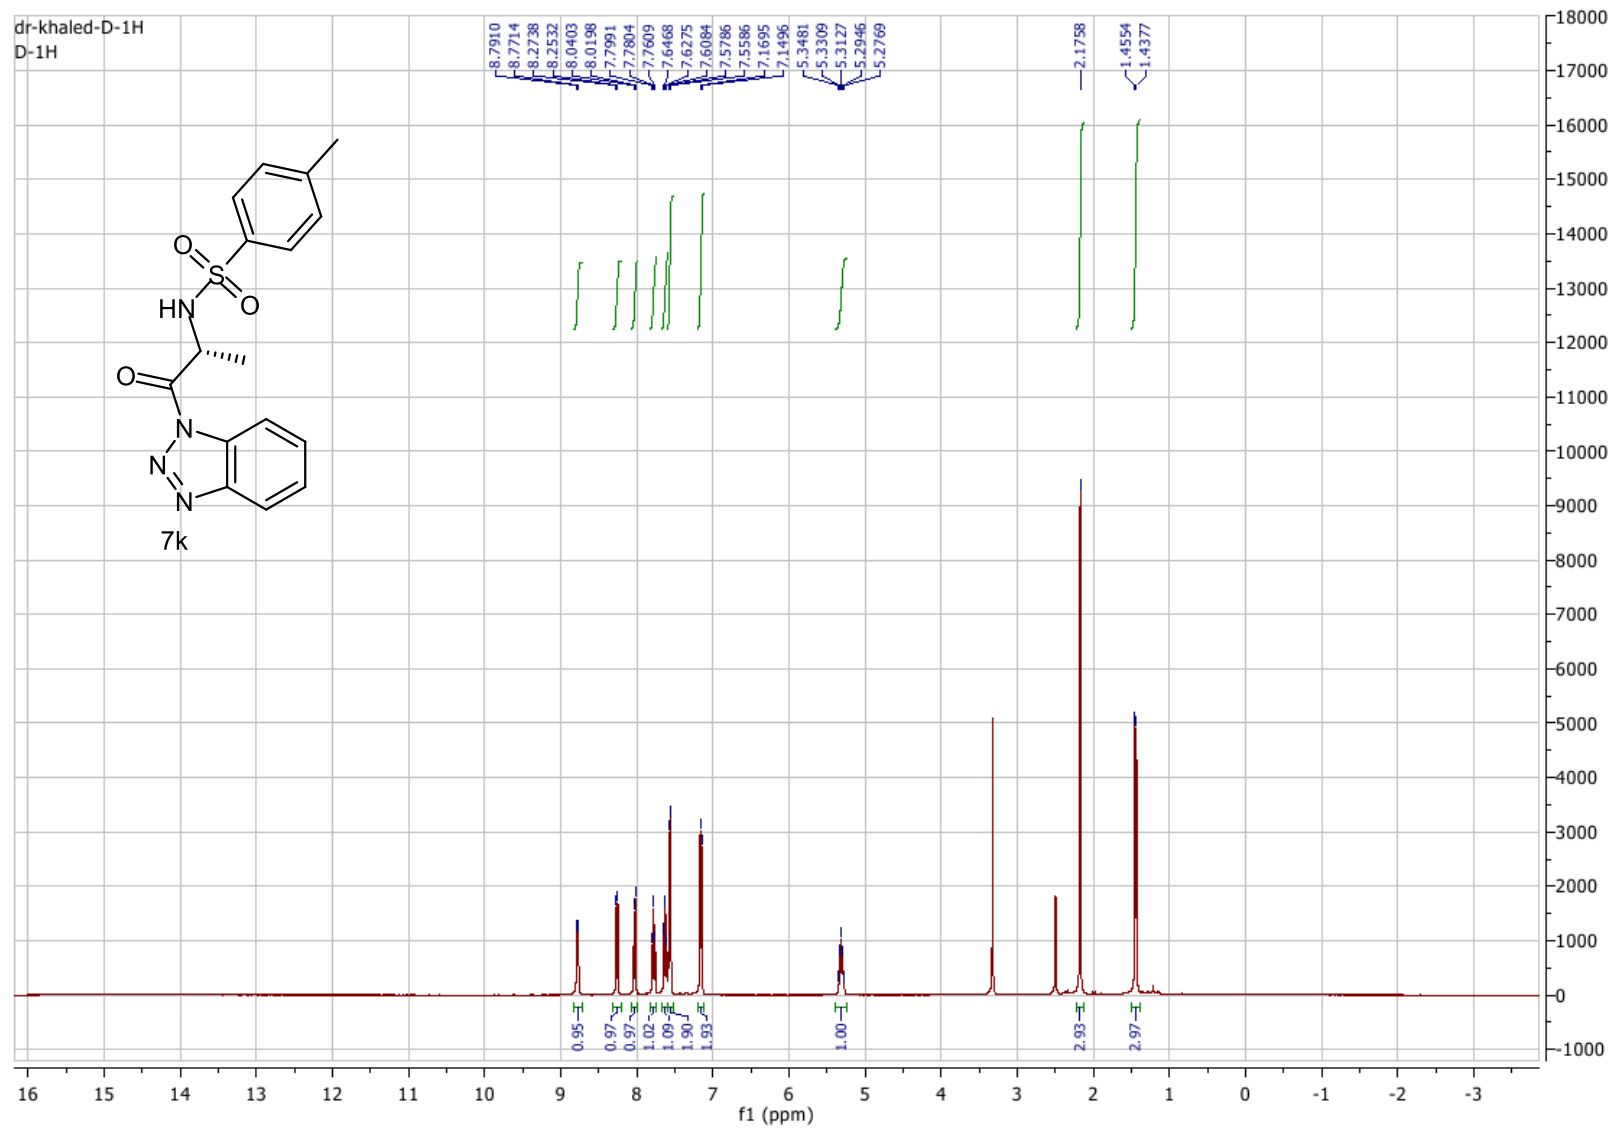

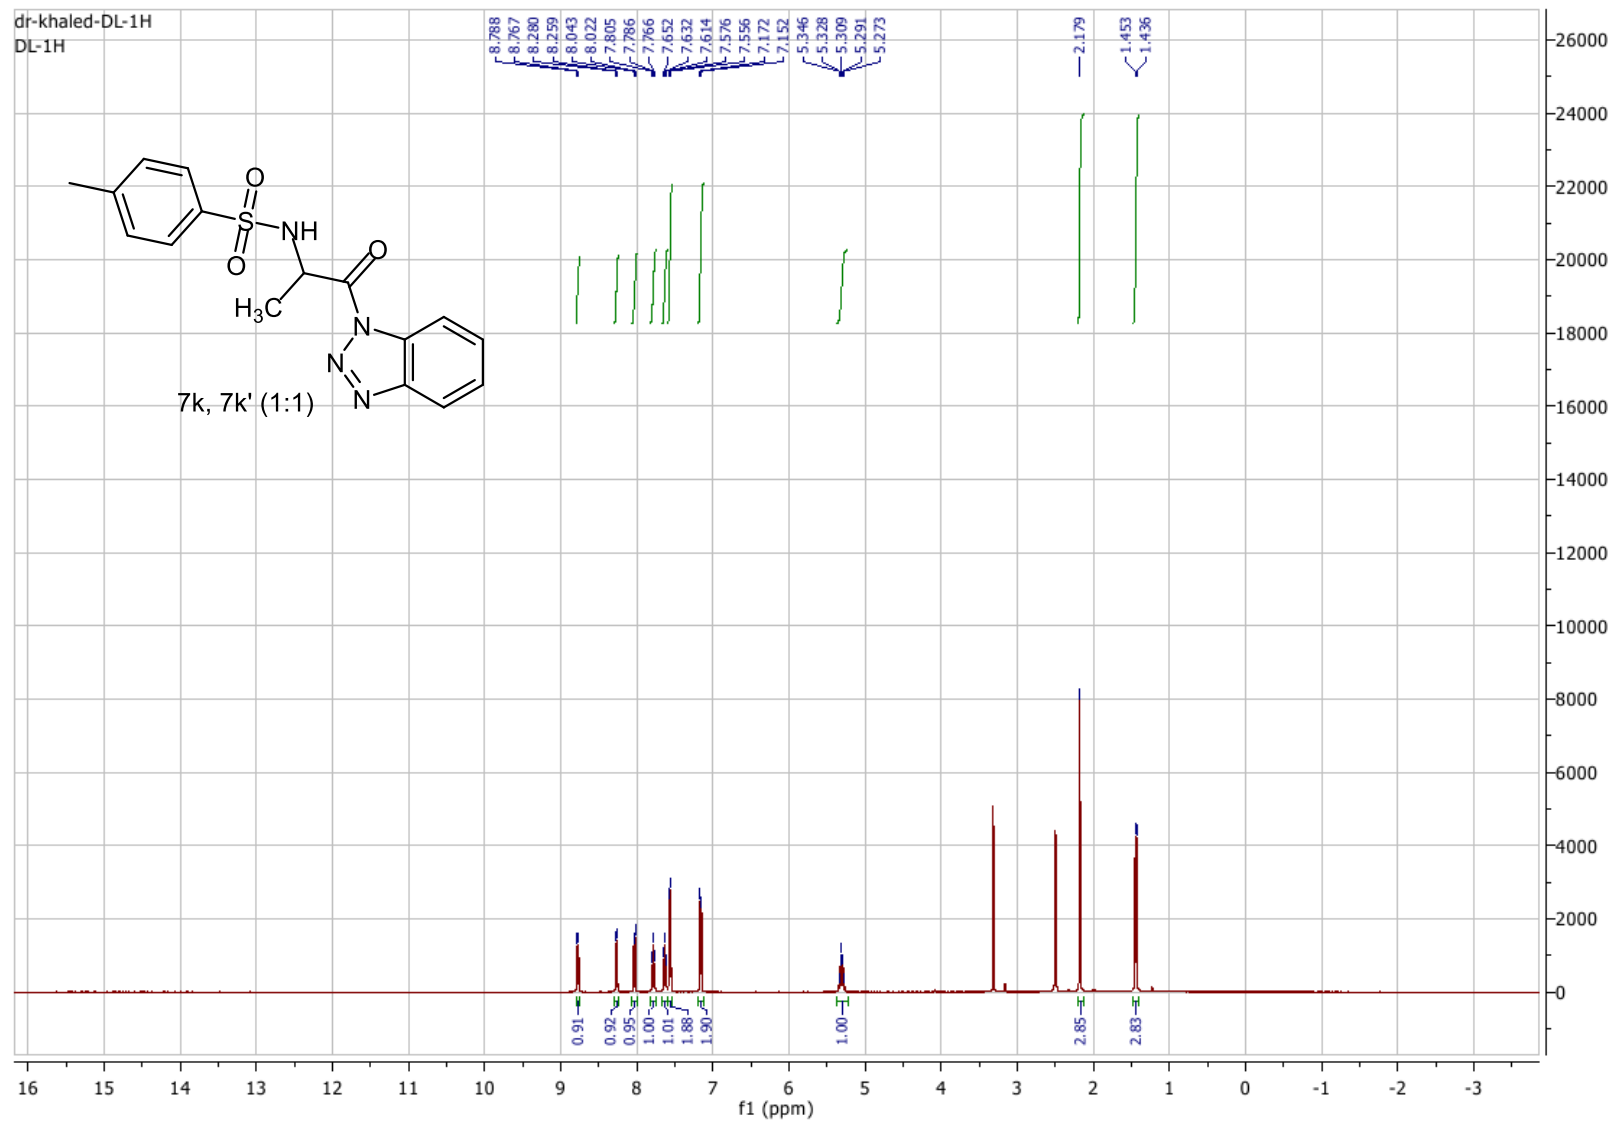

Figure S2. <sup>1</sup>H and <sup>13</sup>C NMR spectra of compounds 8a–j.

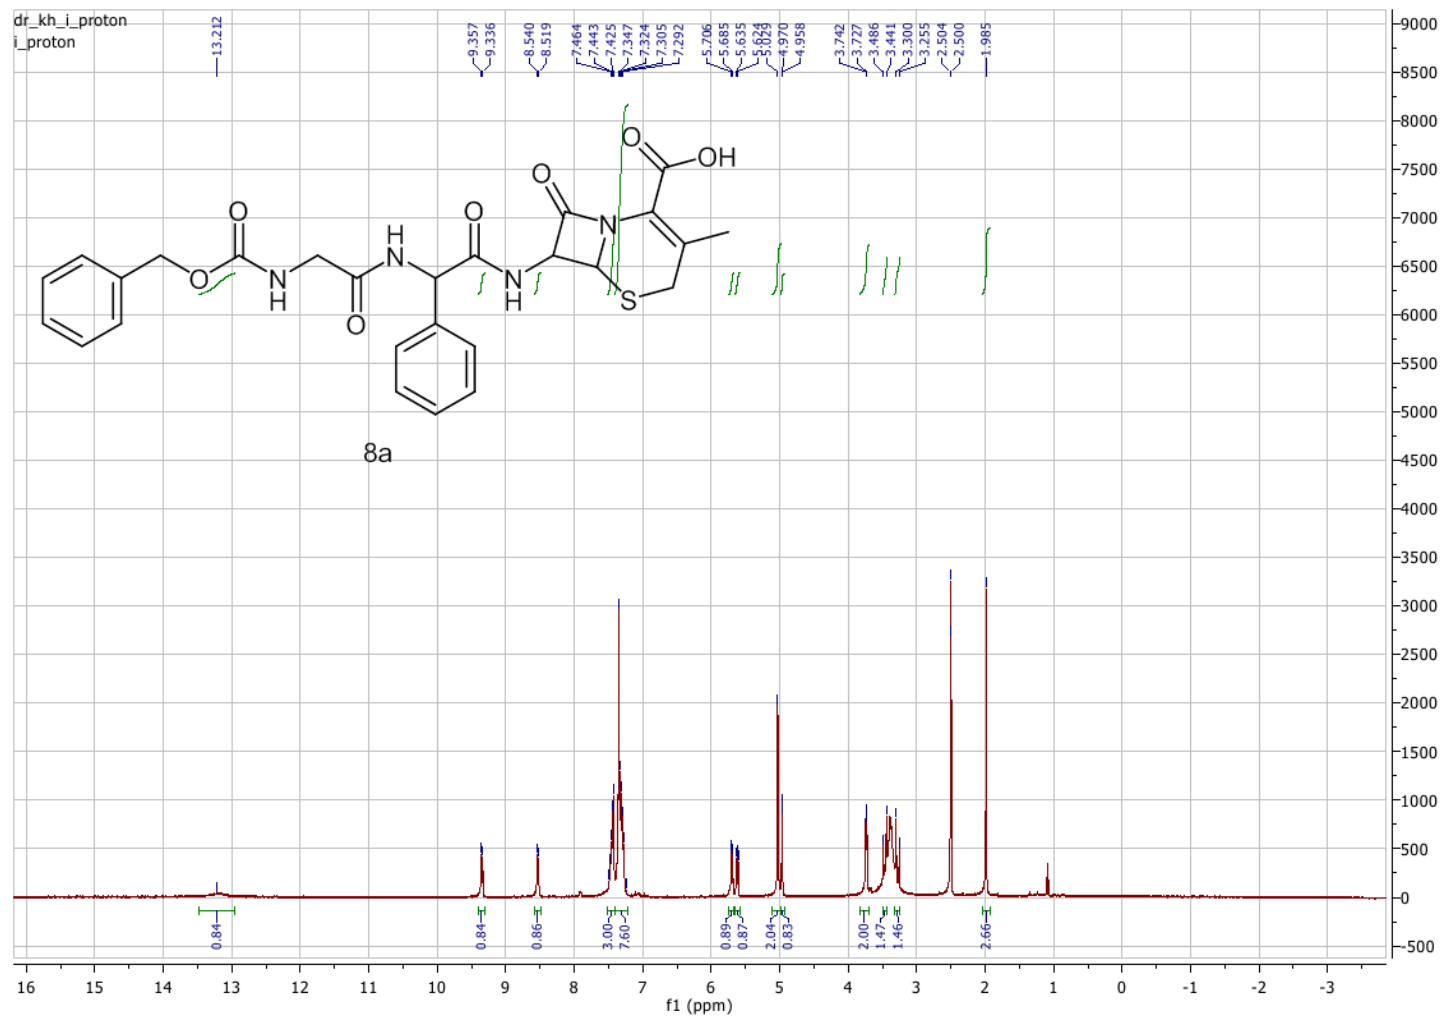



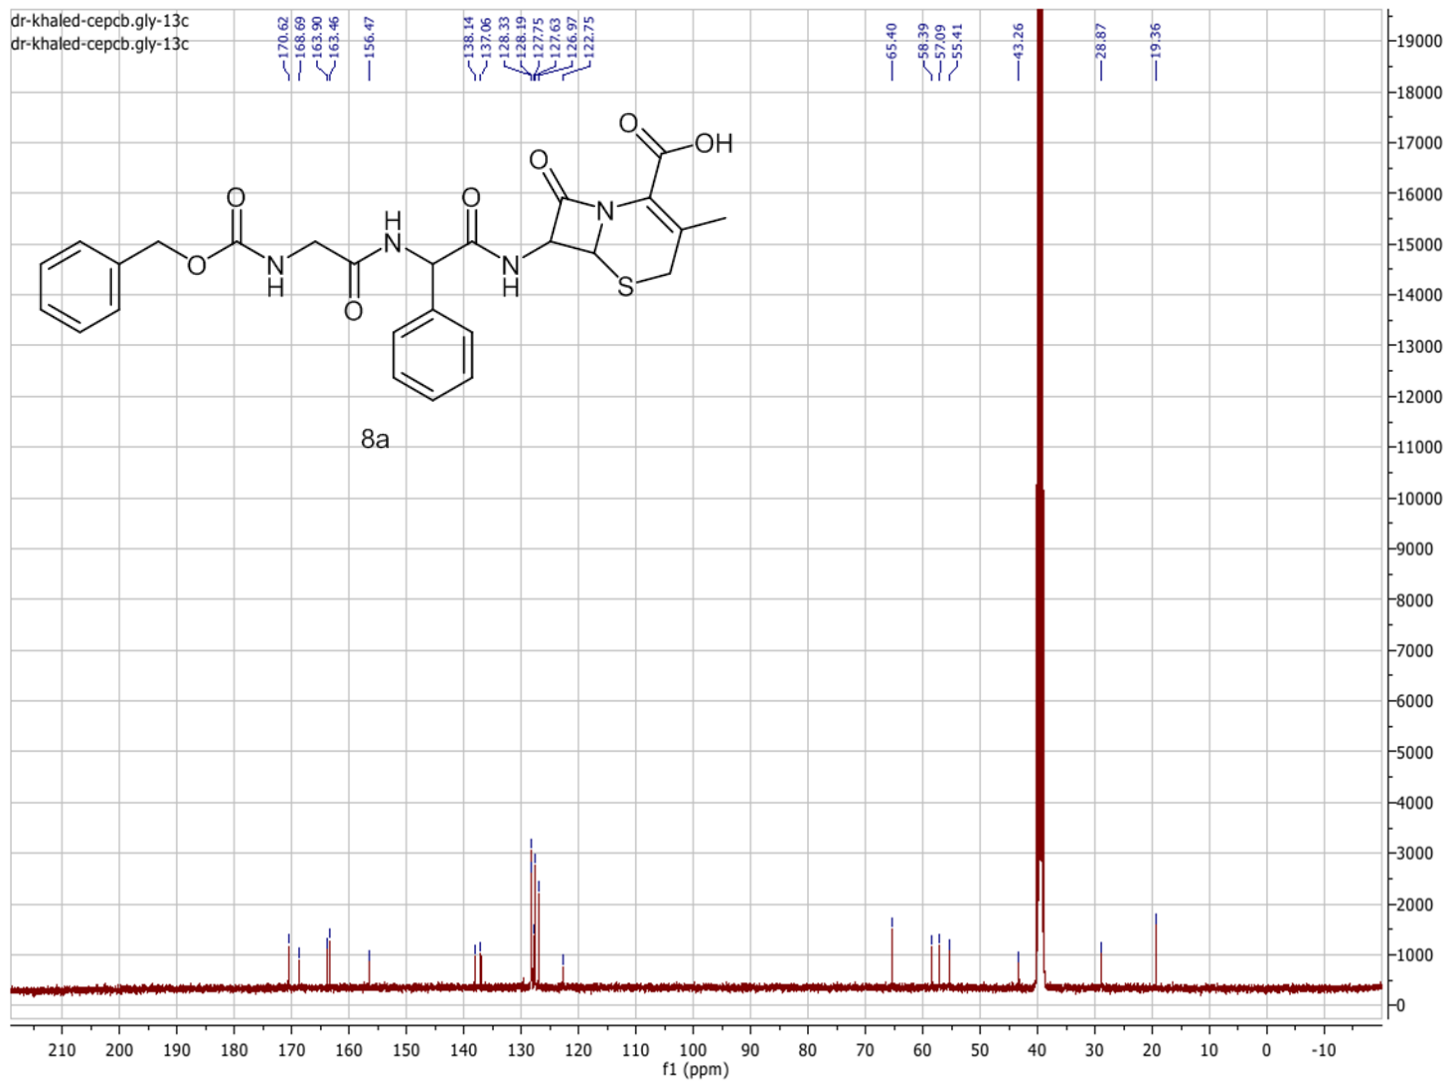

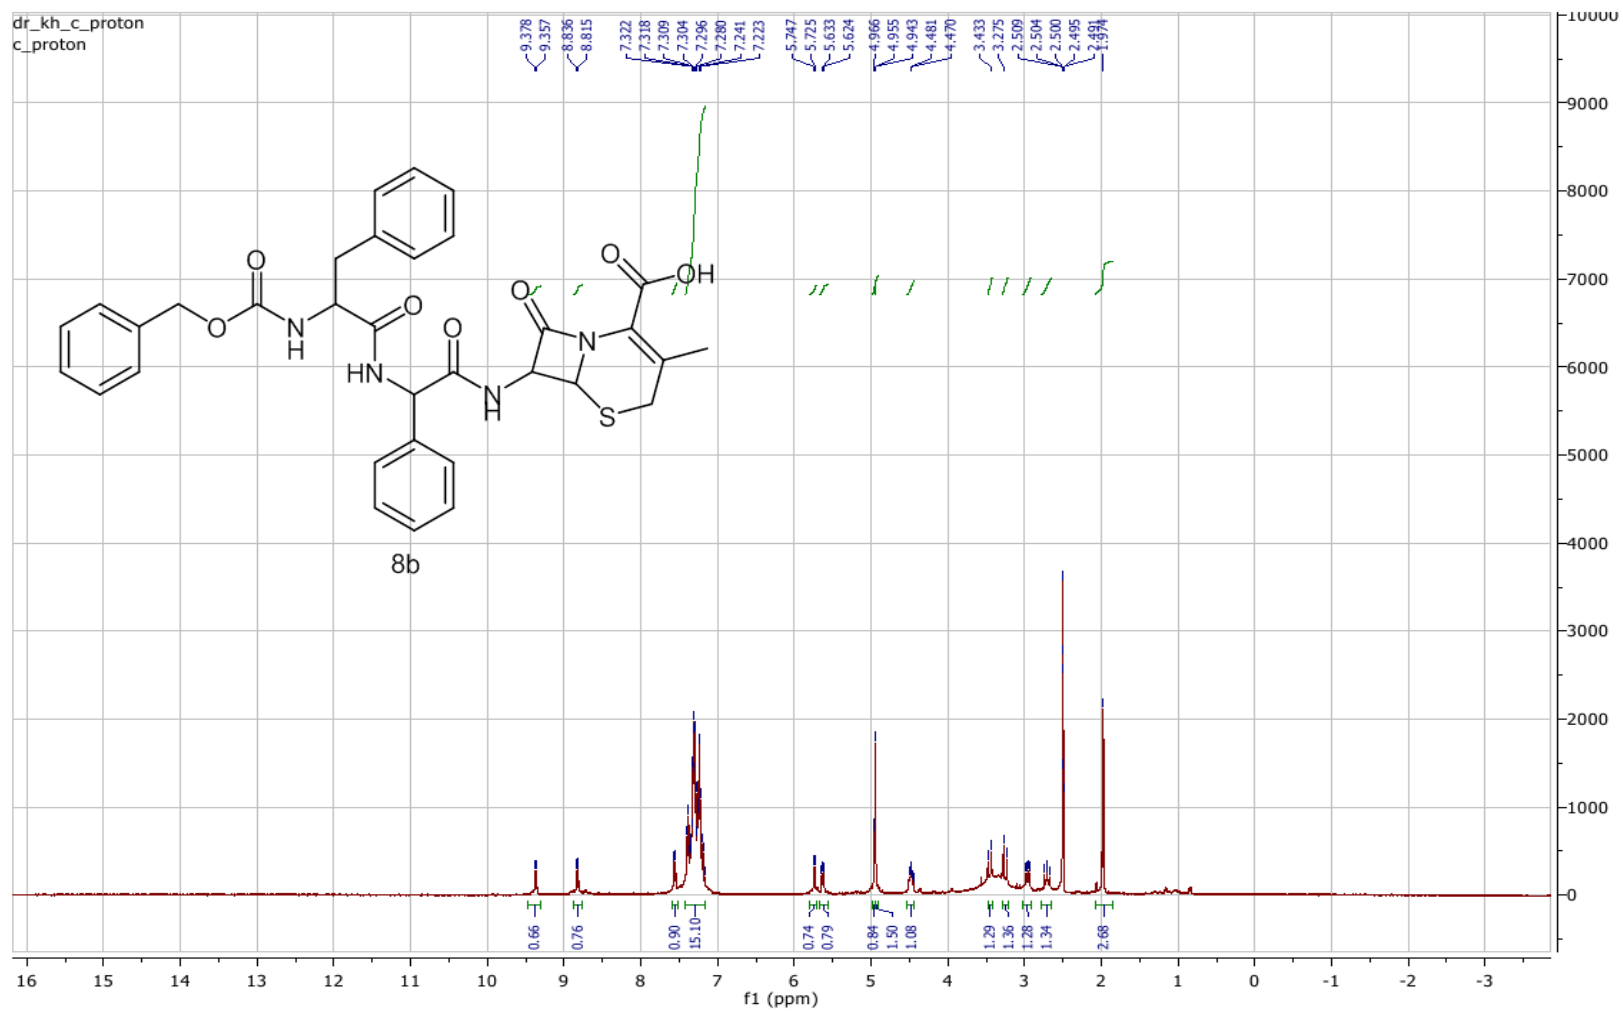

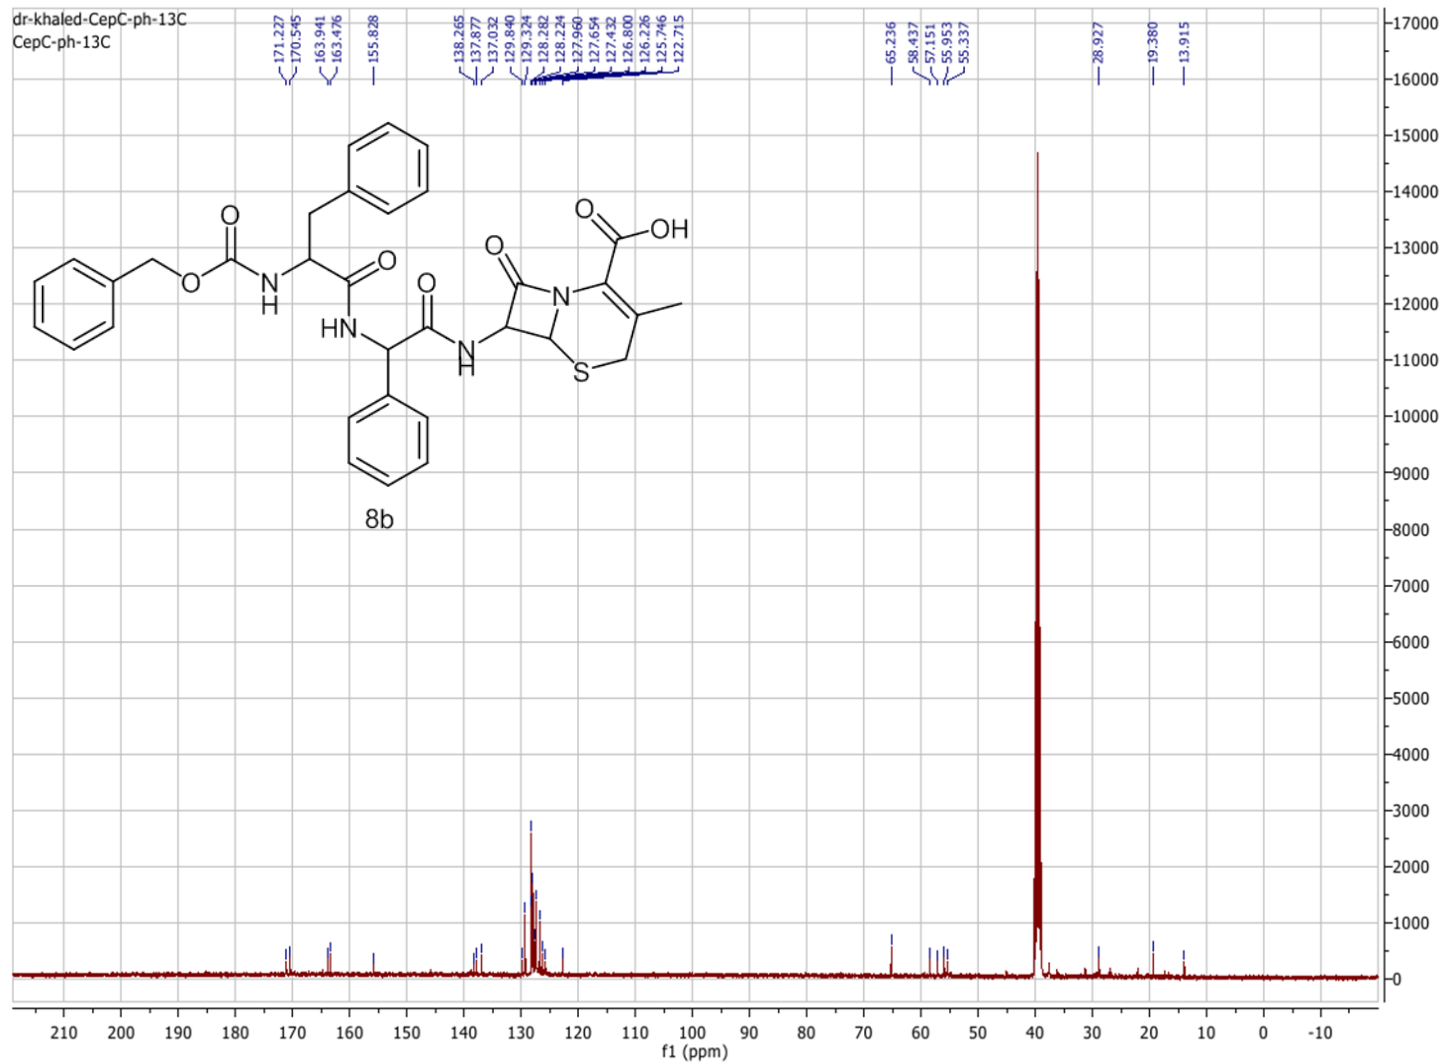

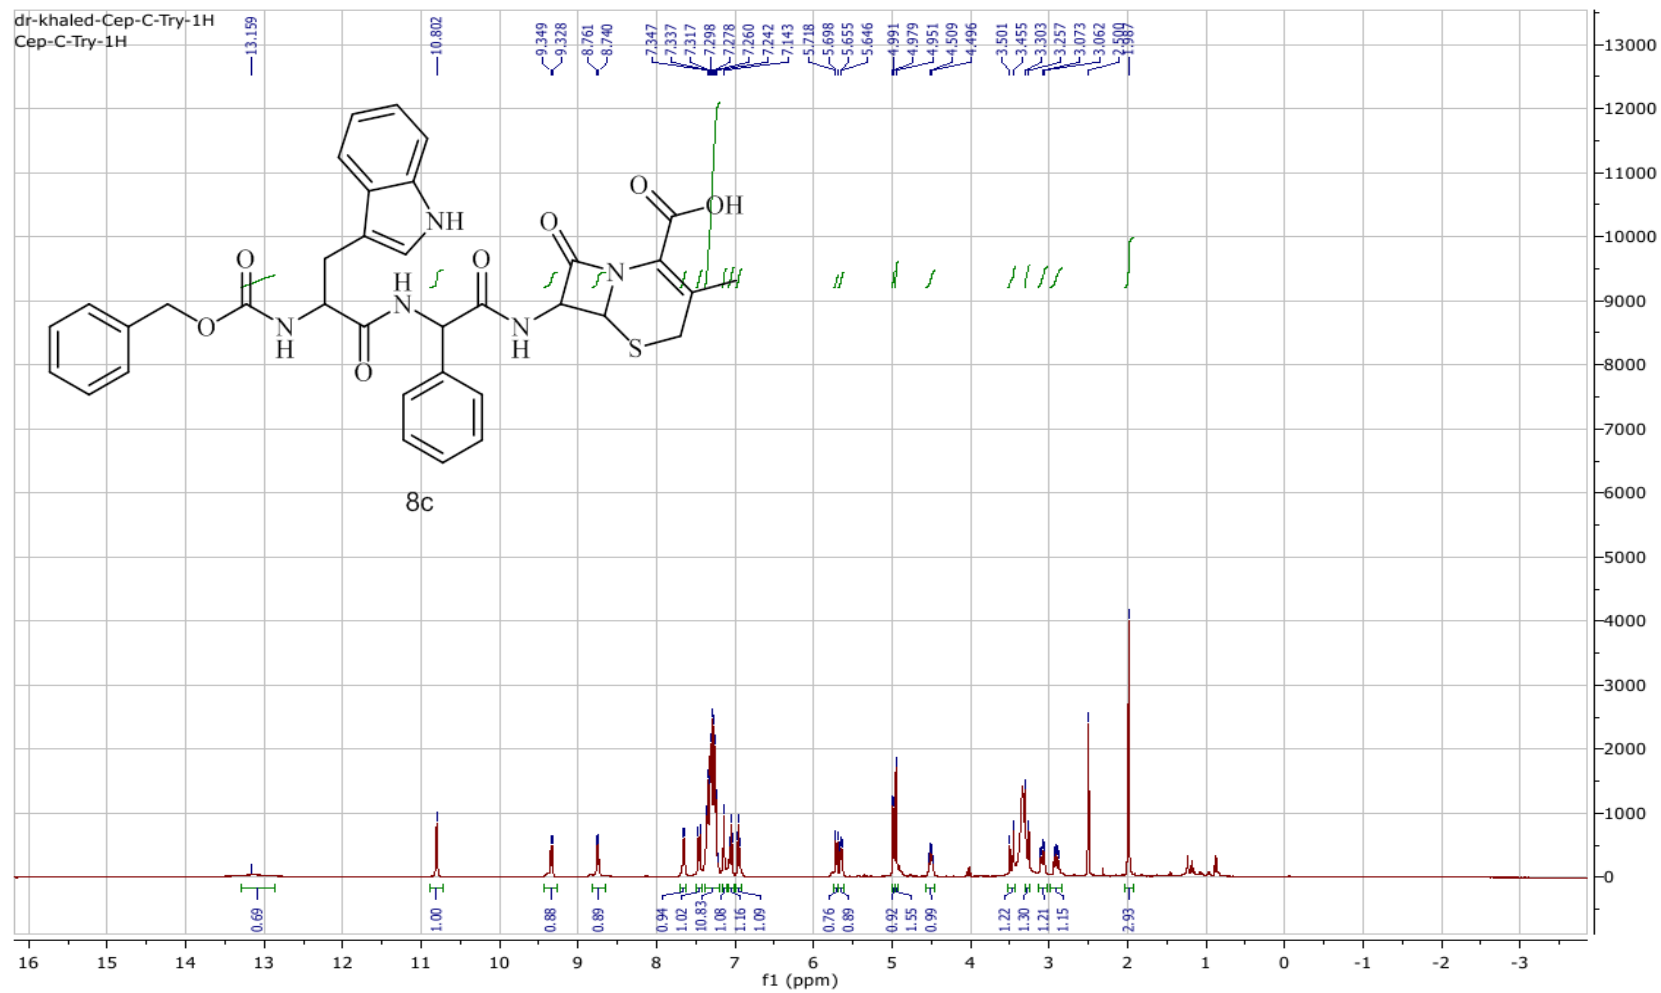

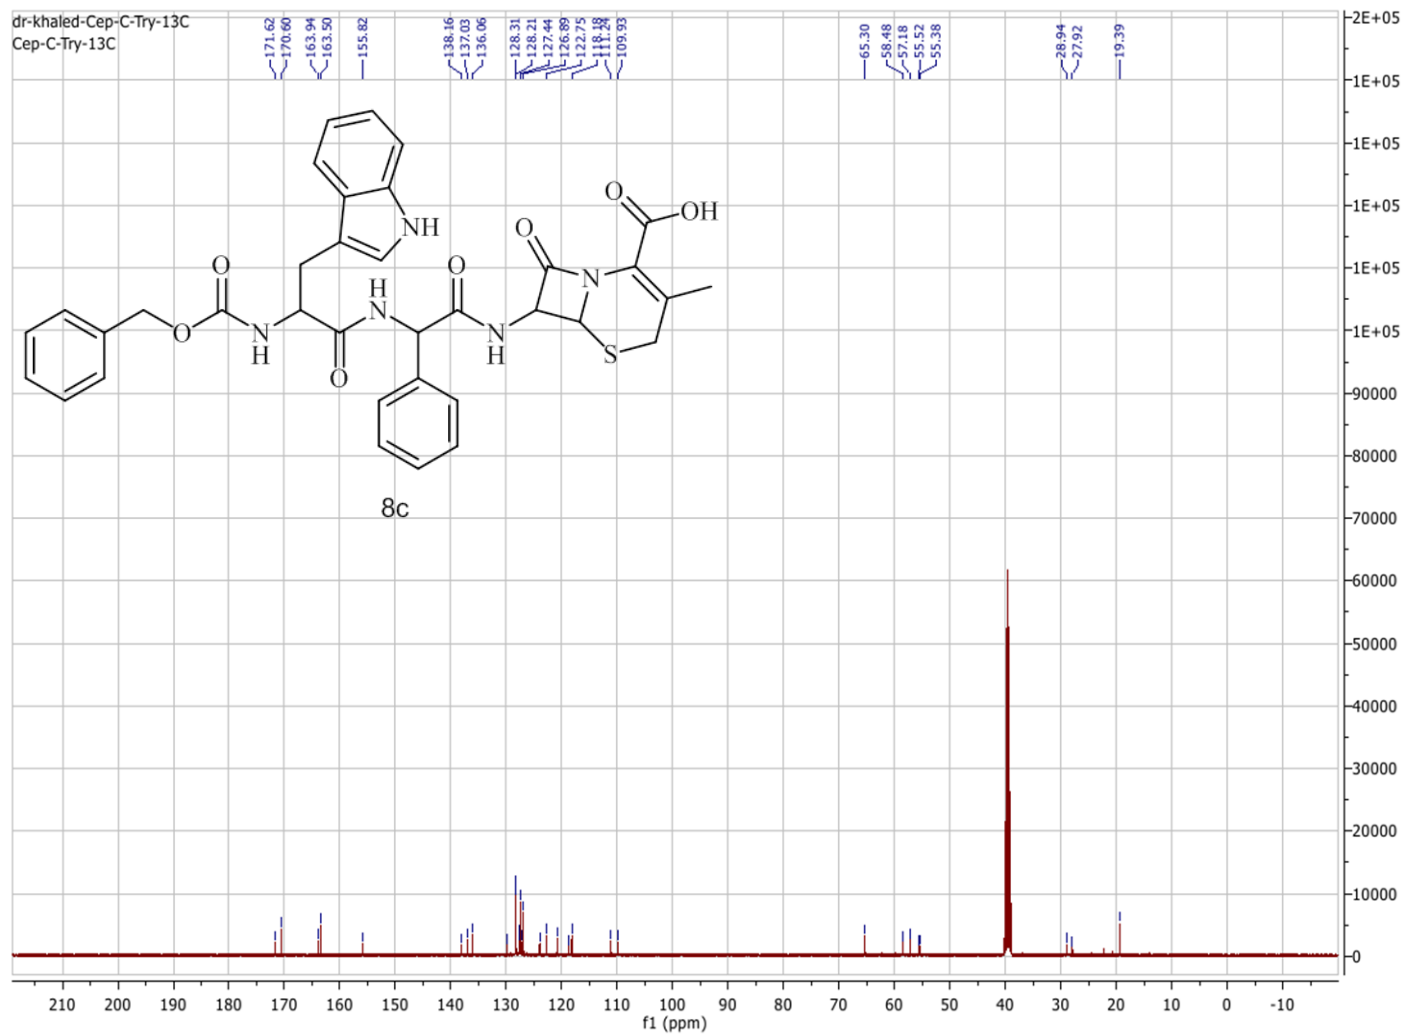

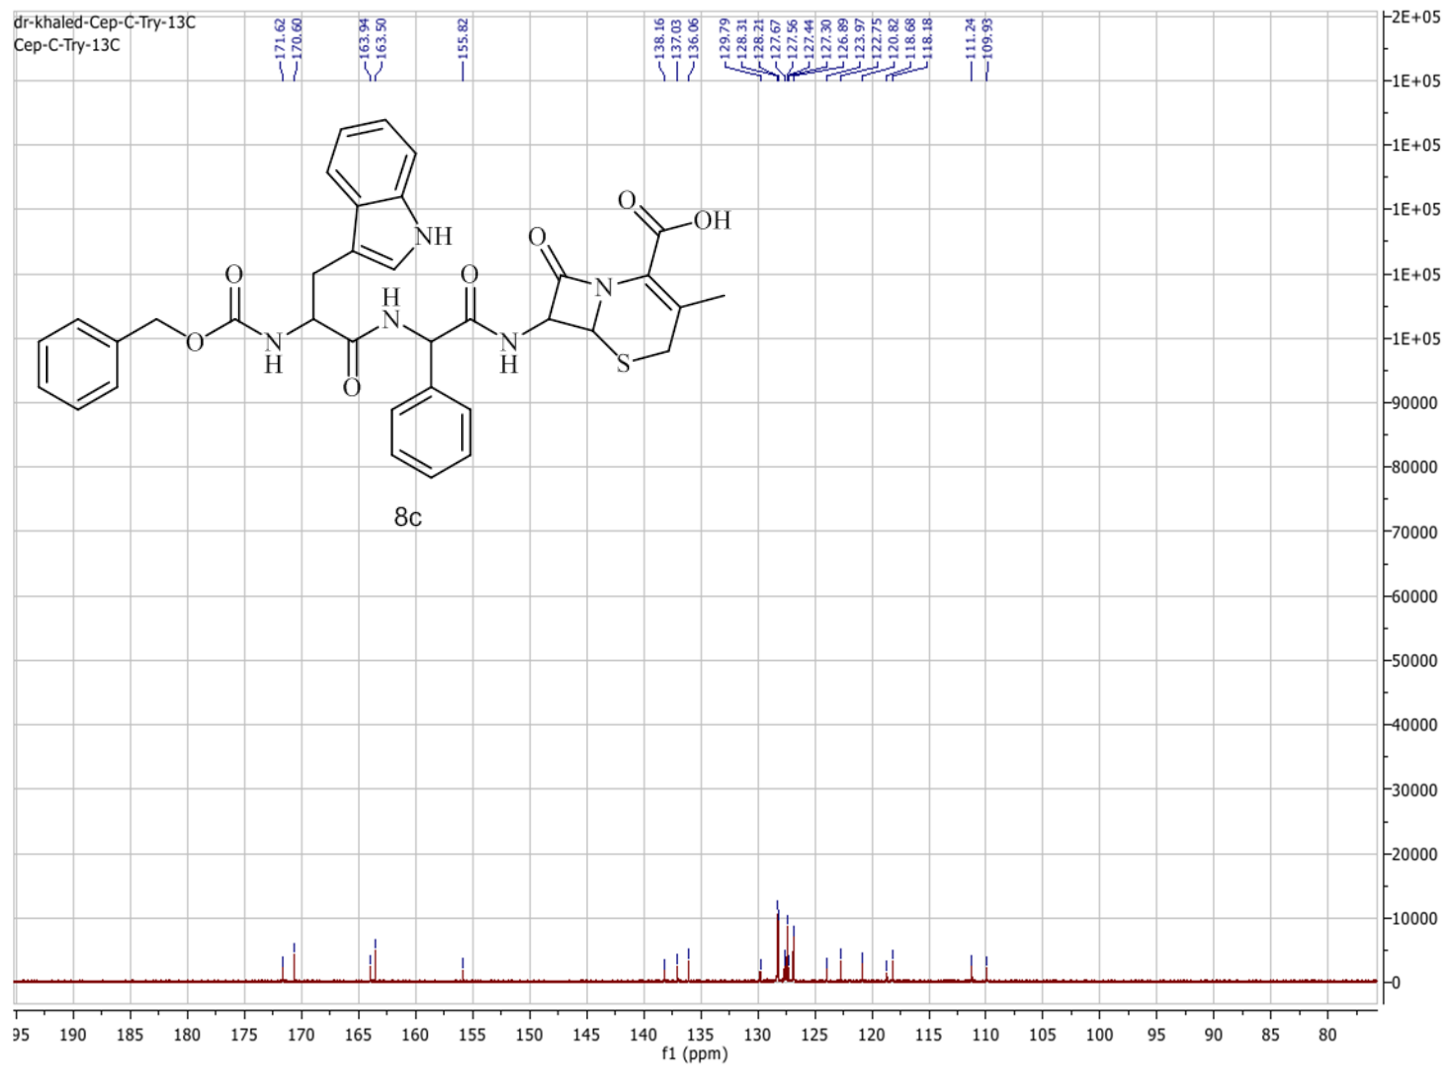

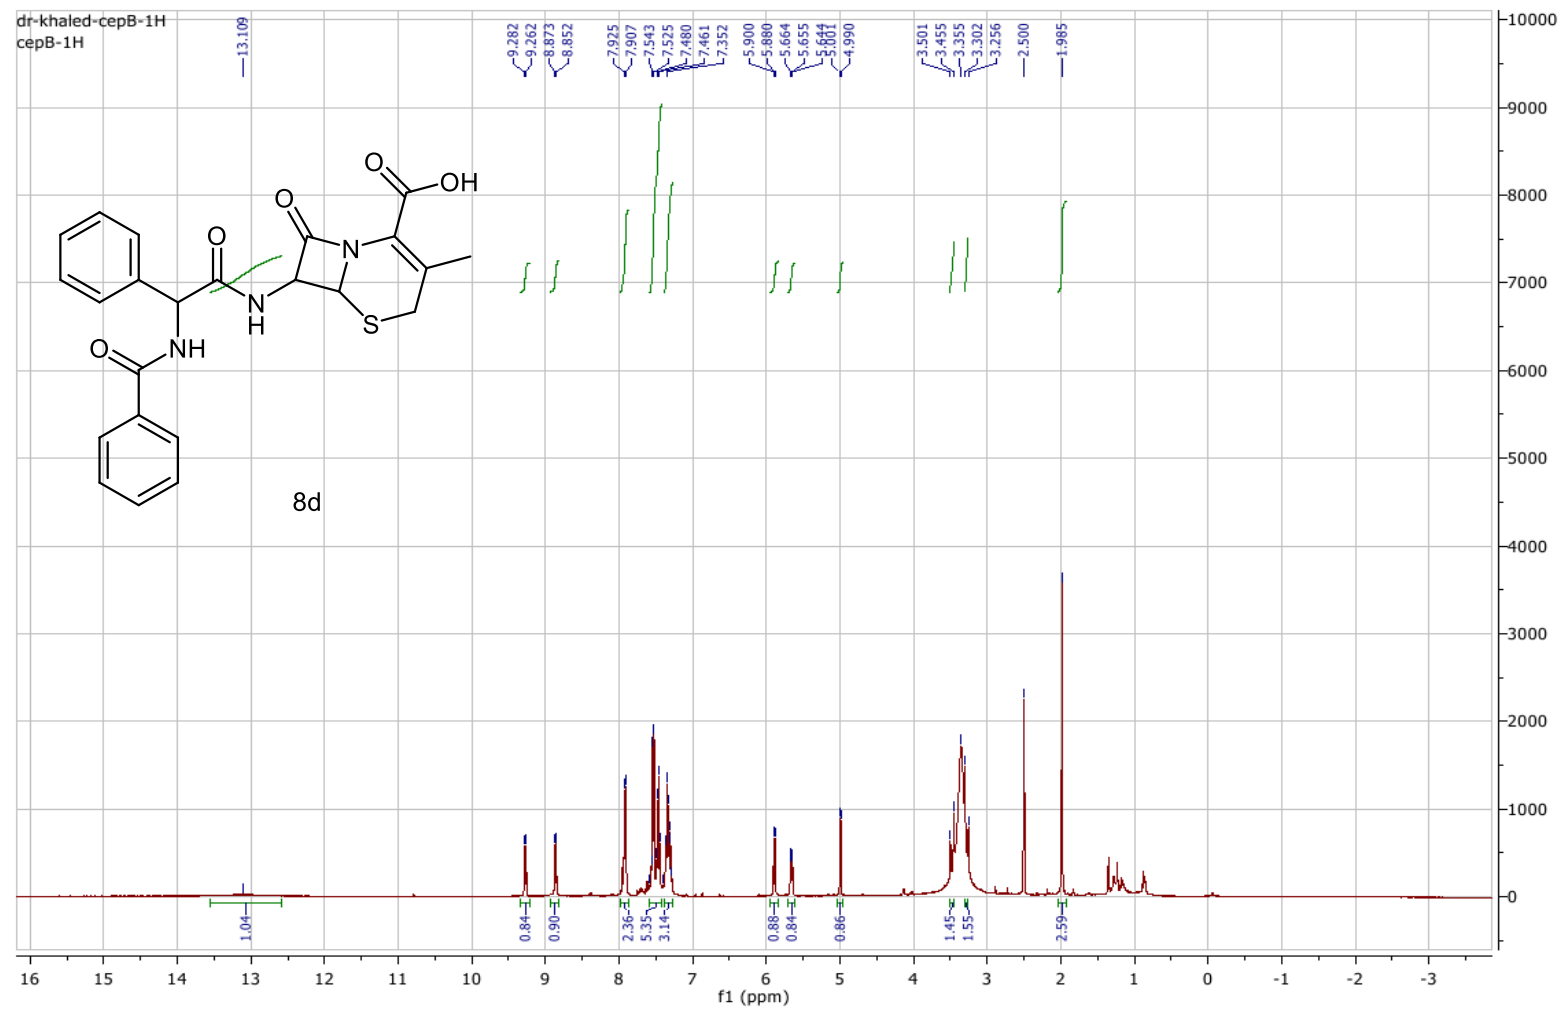

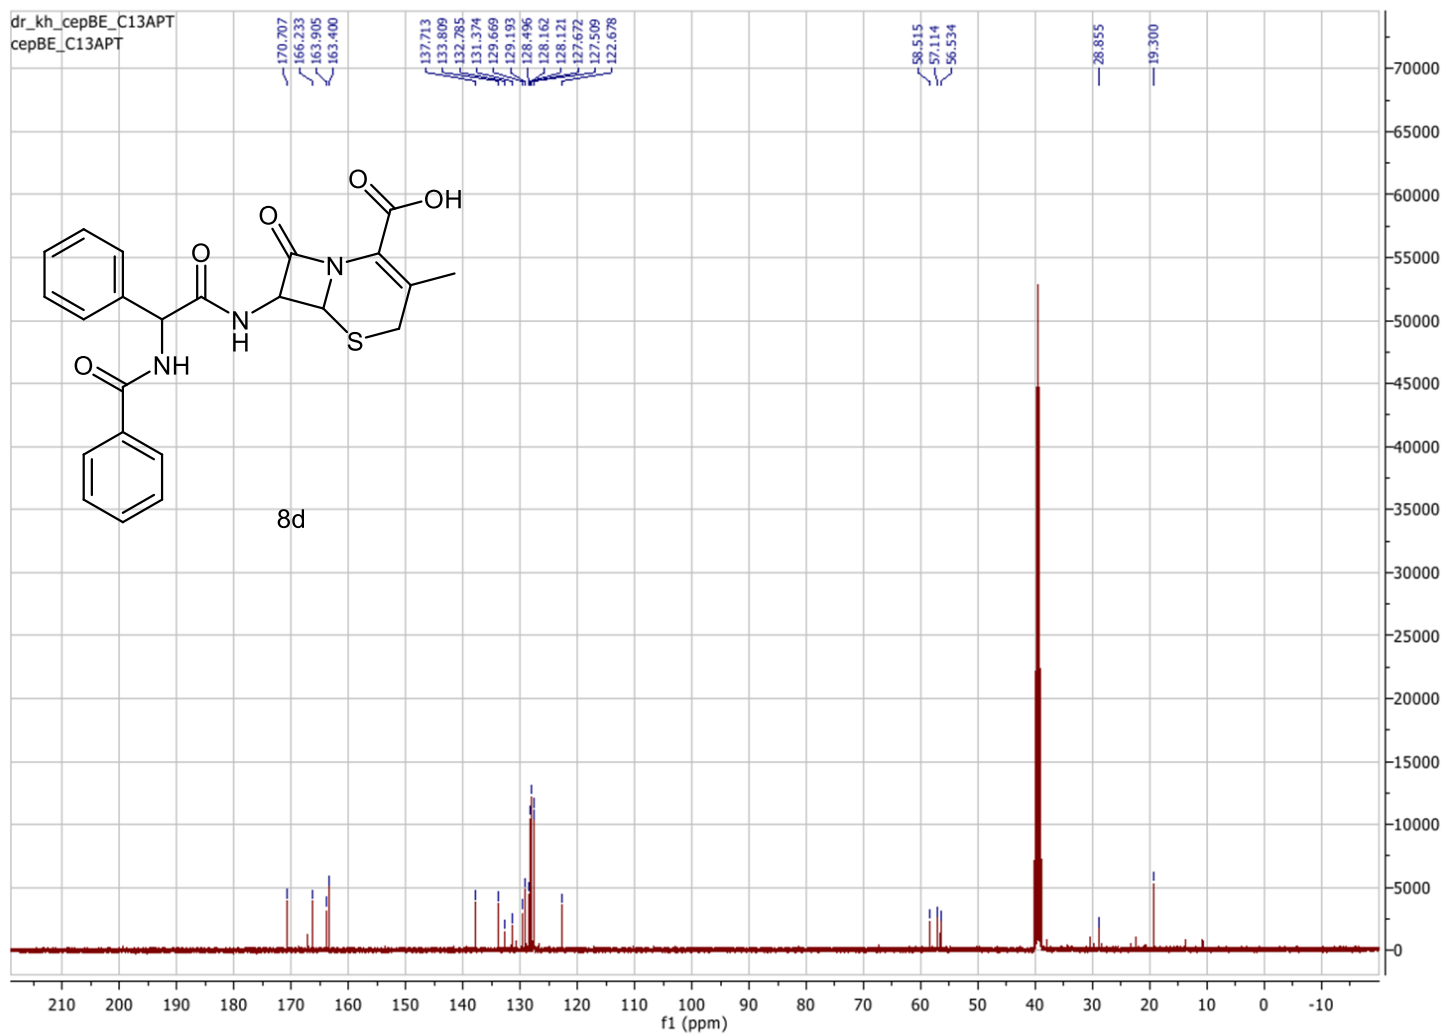



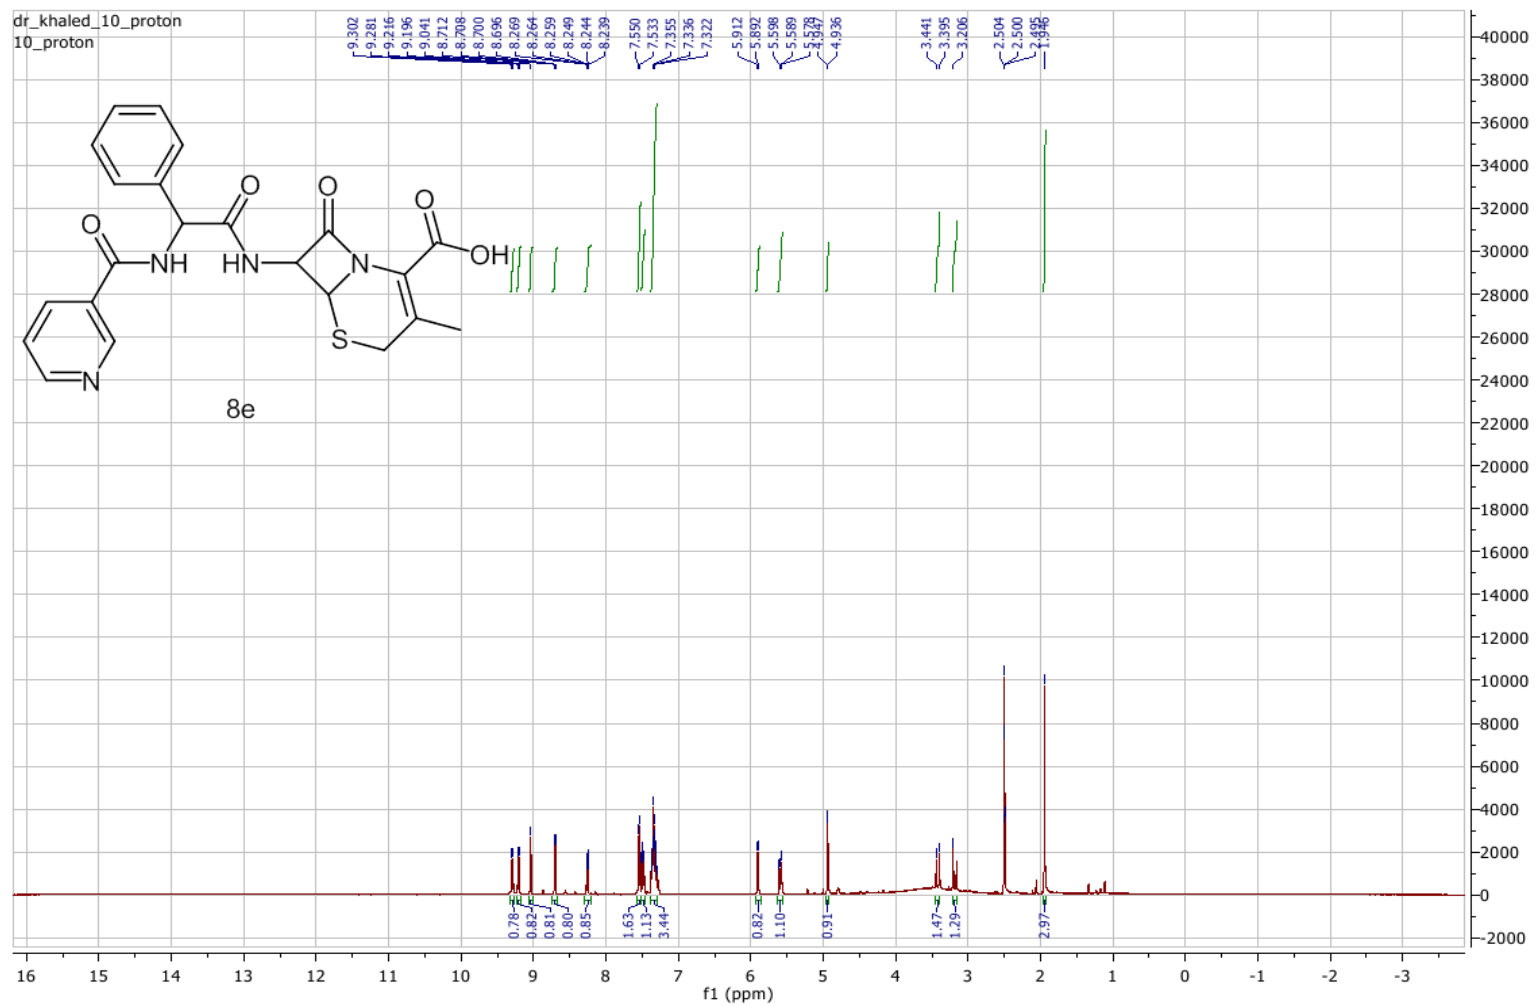

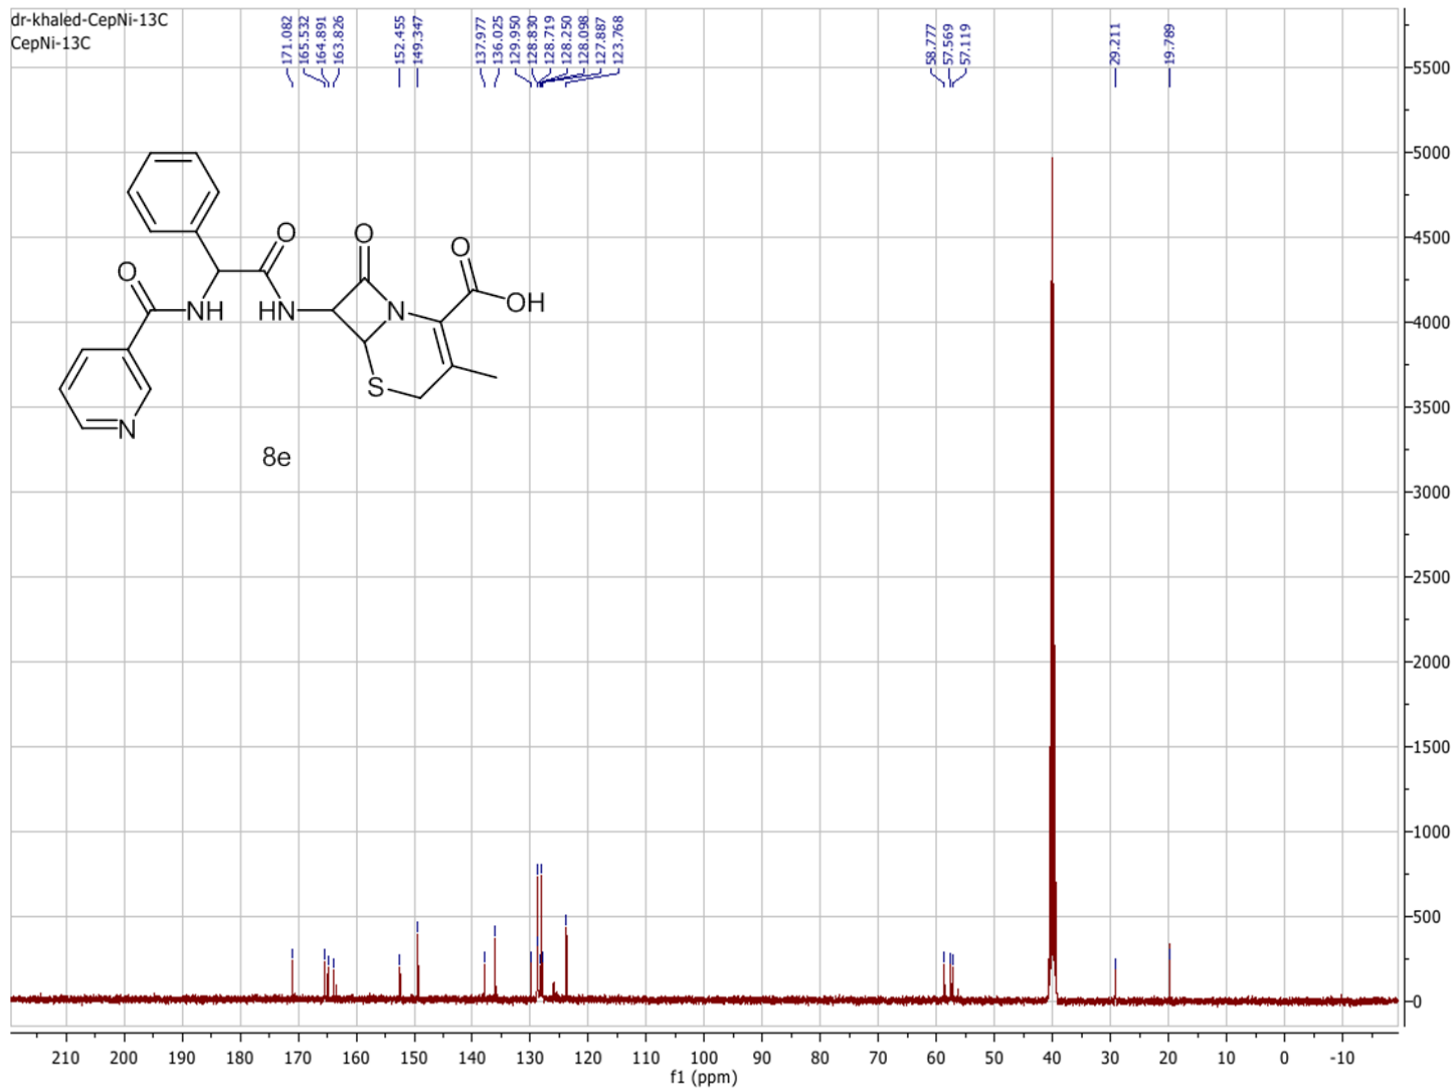

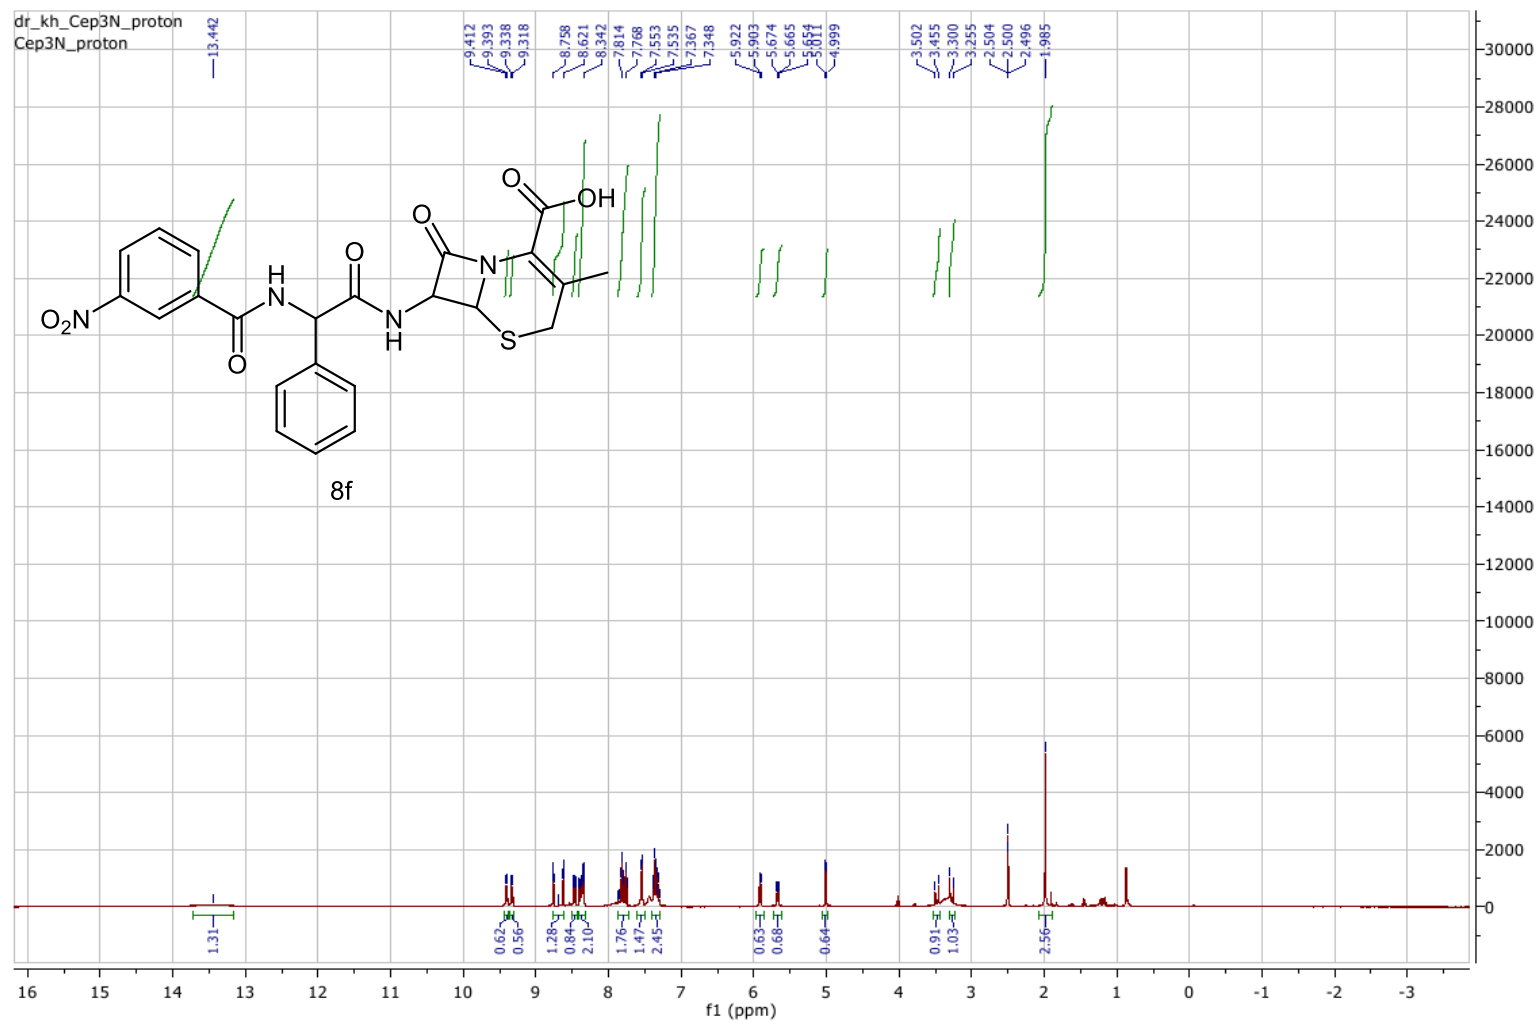

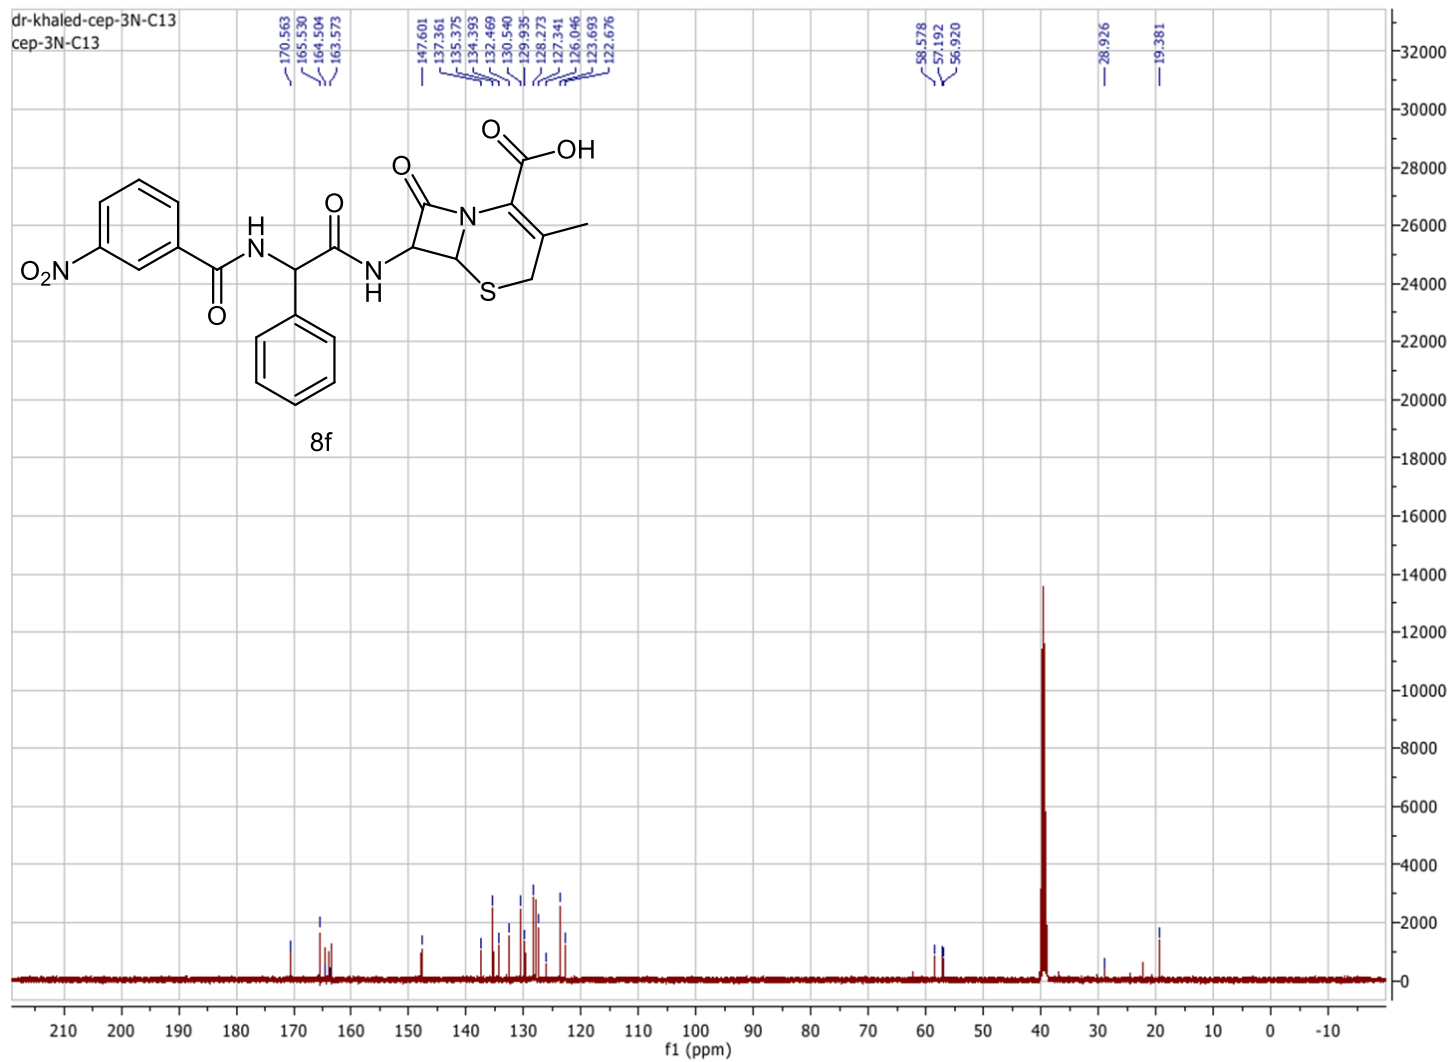

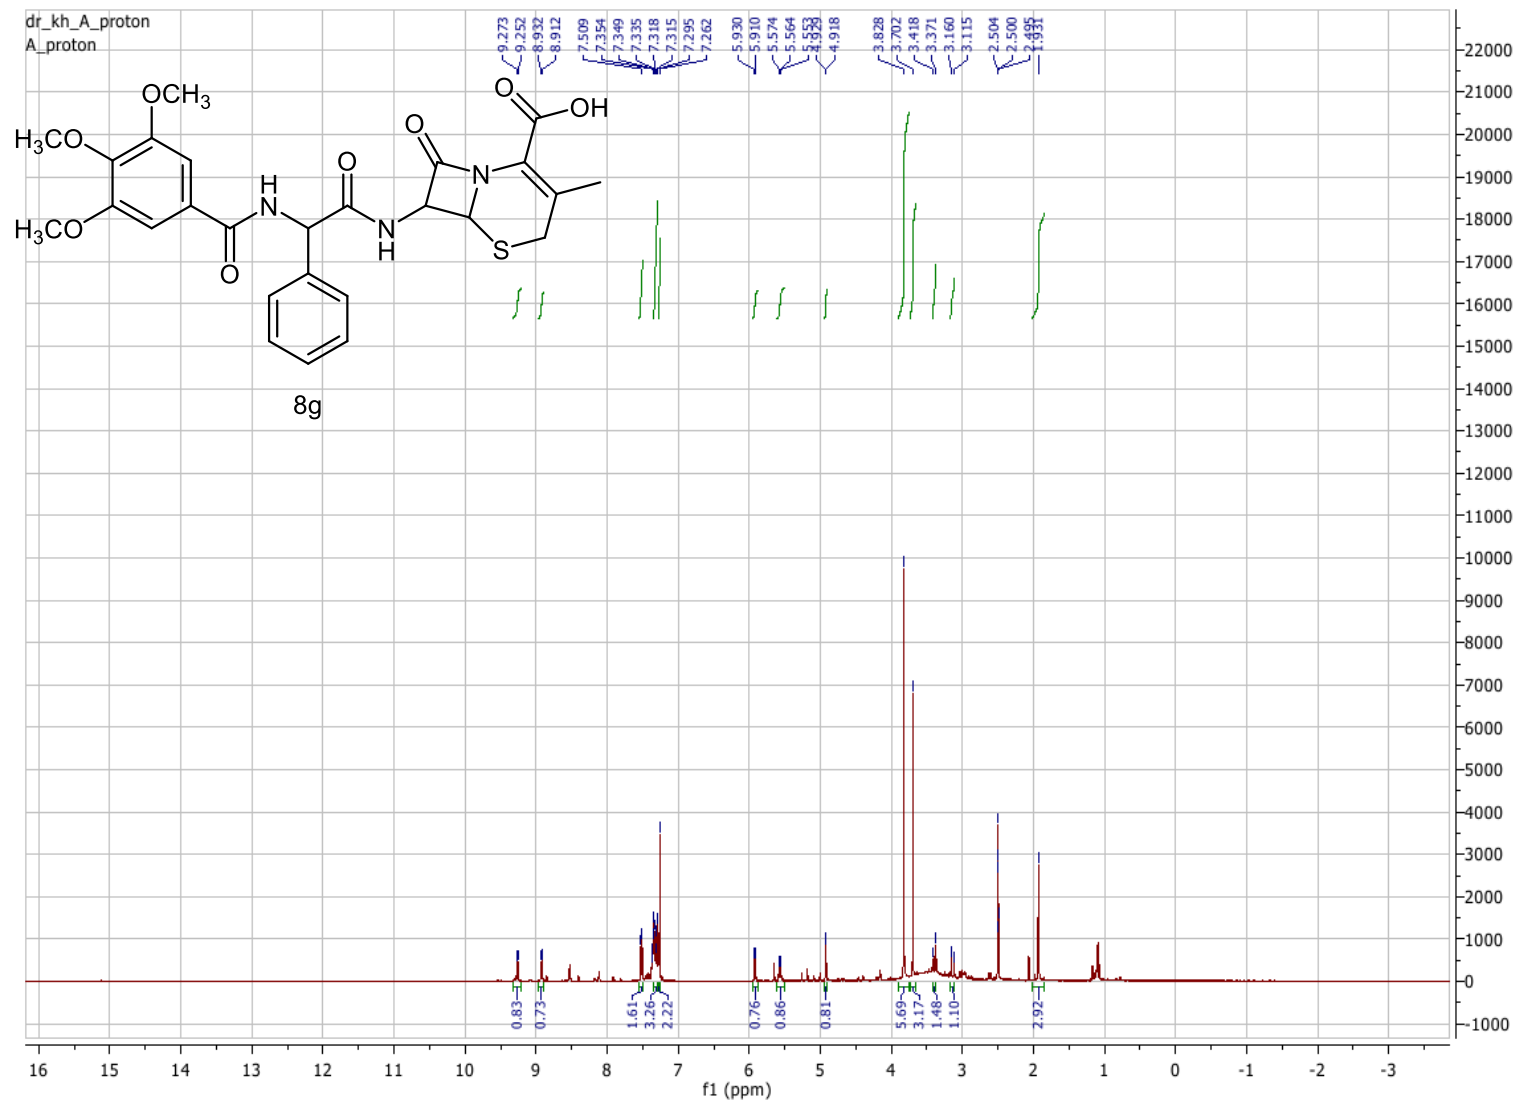

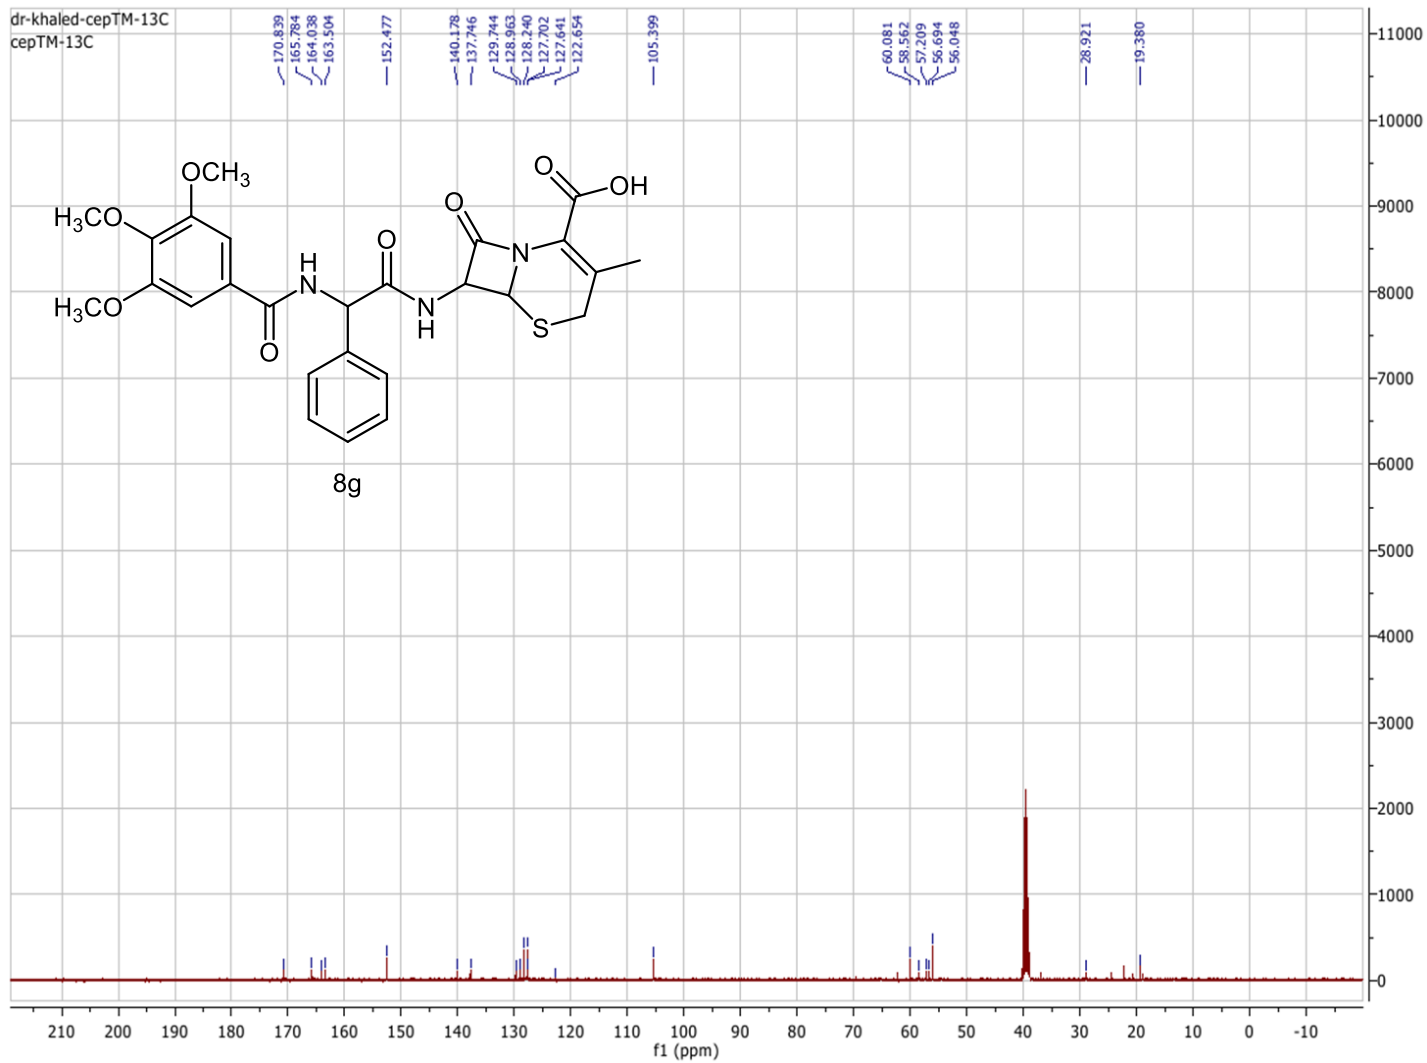

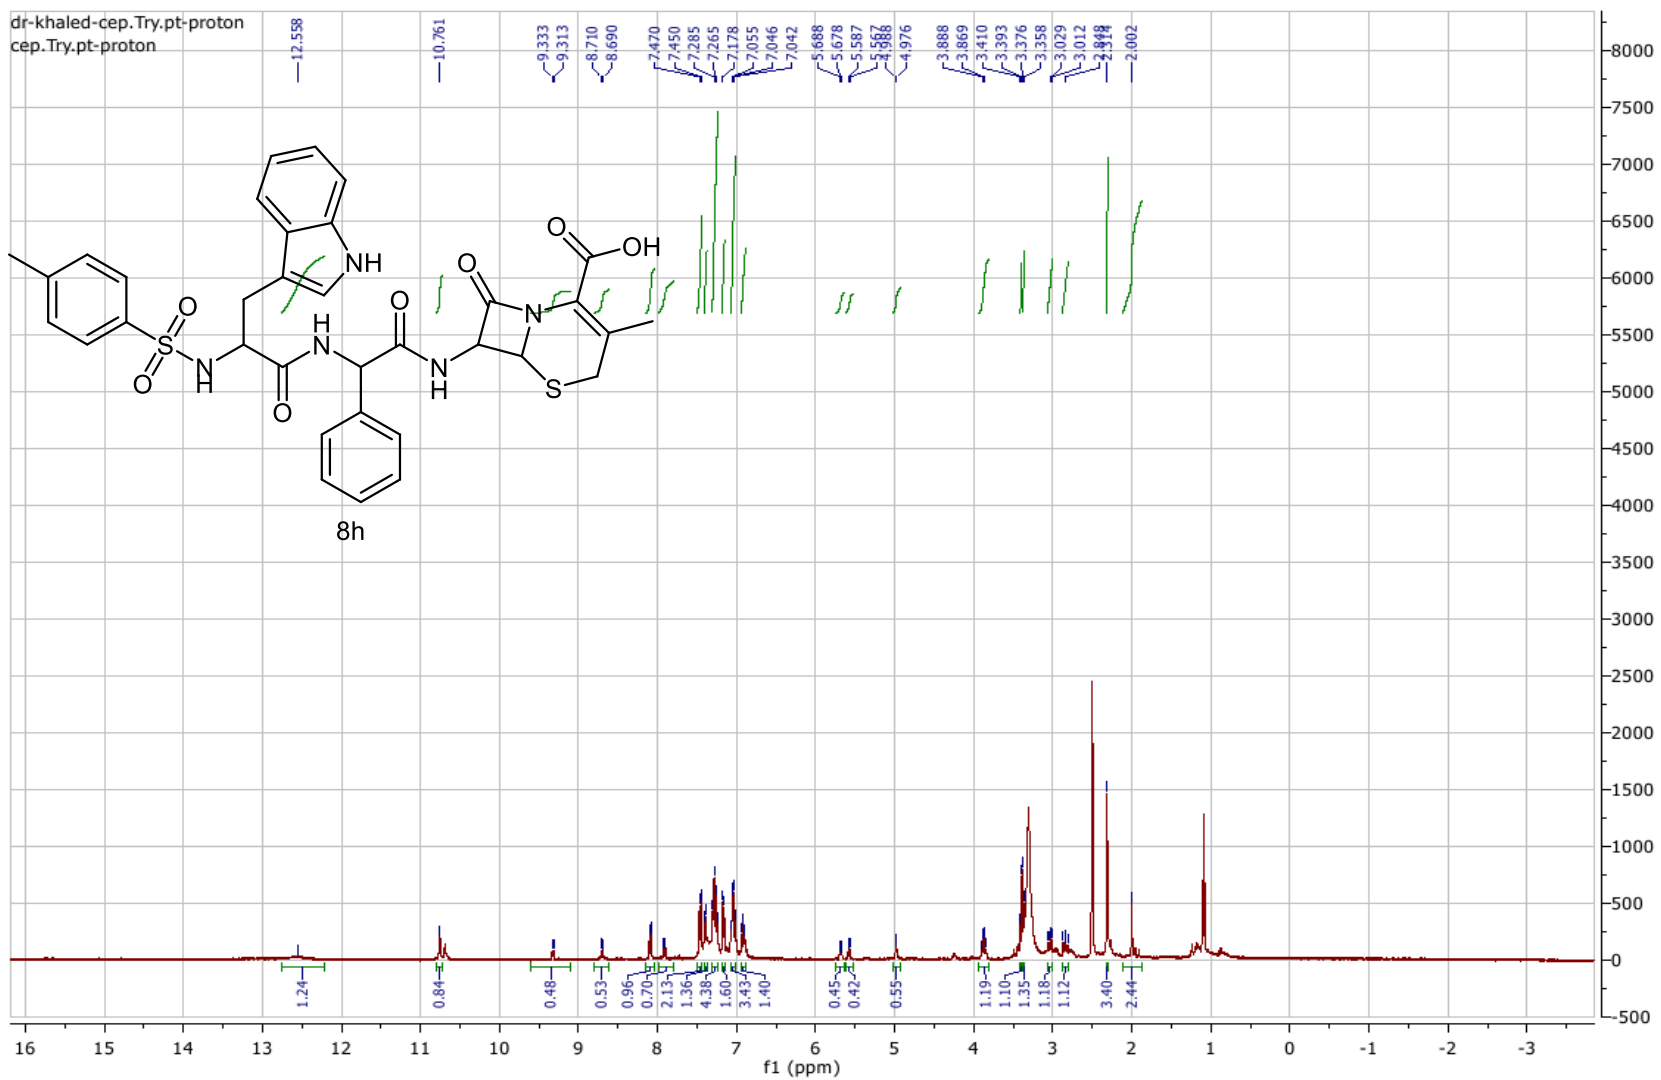

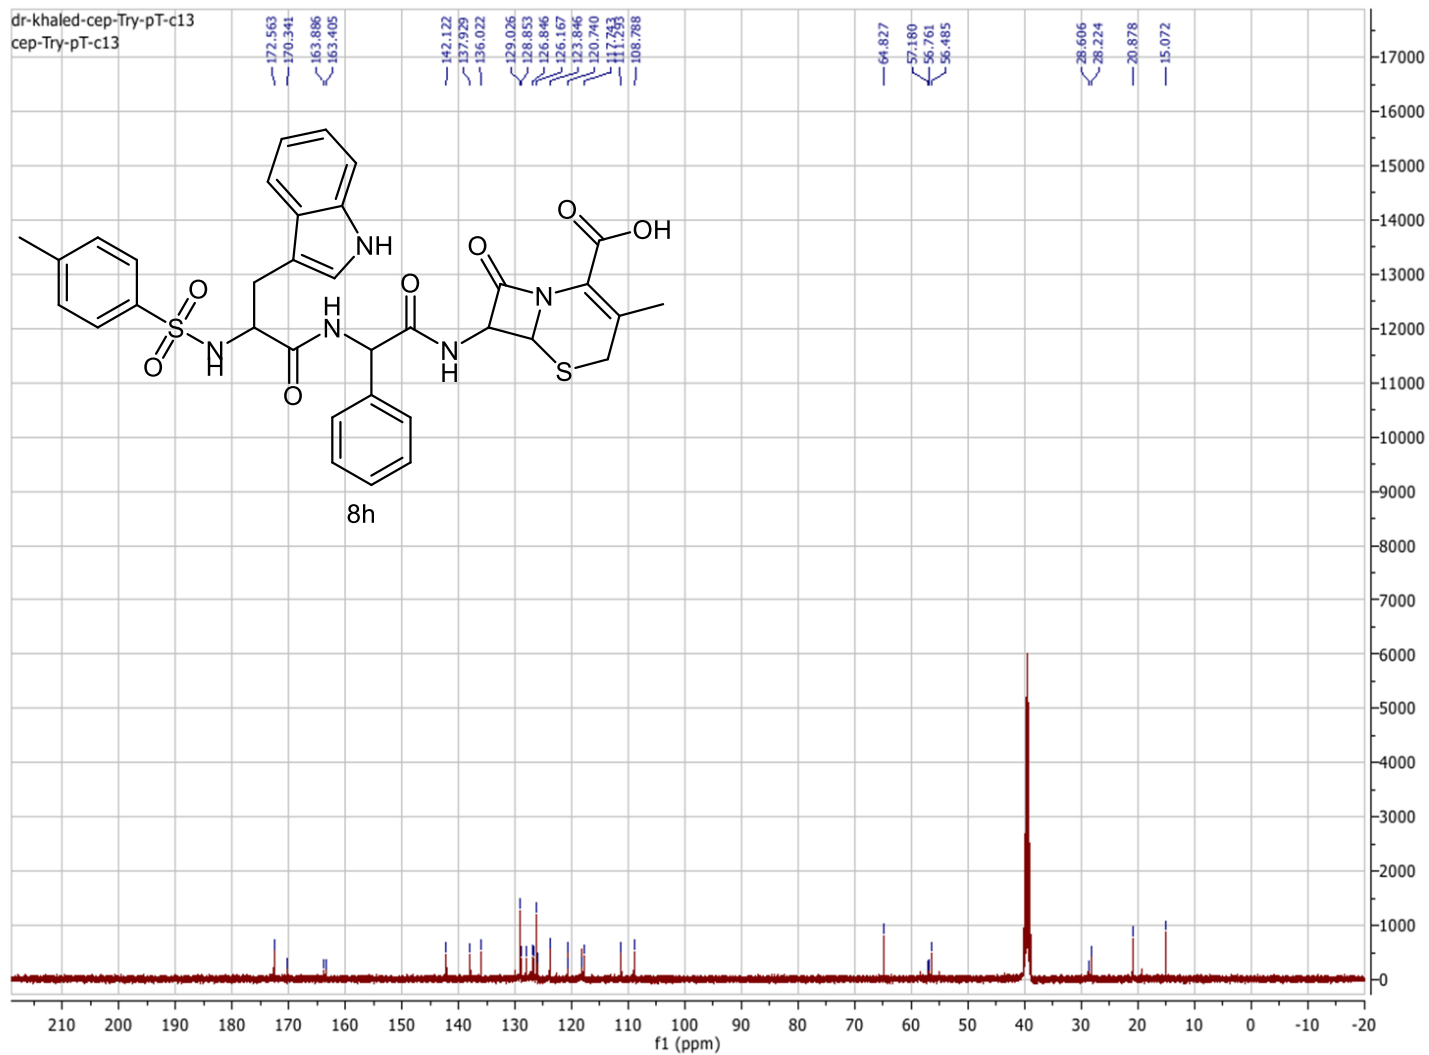



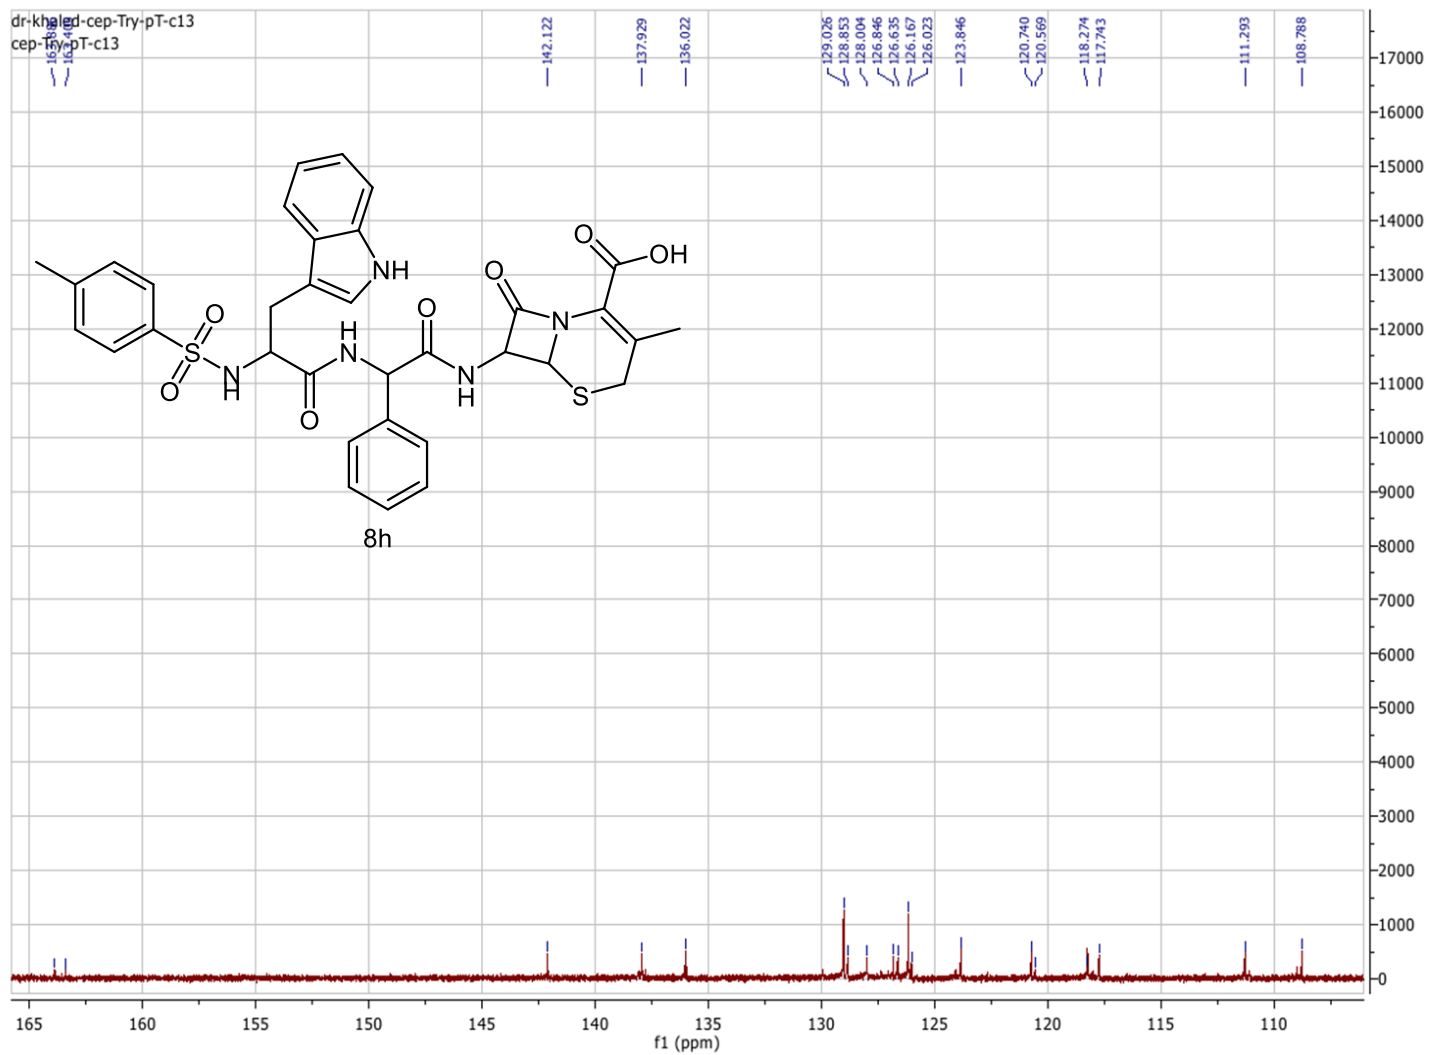

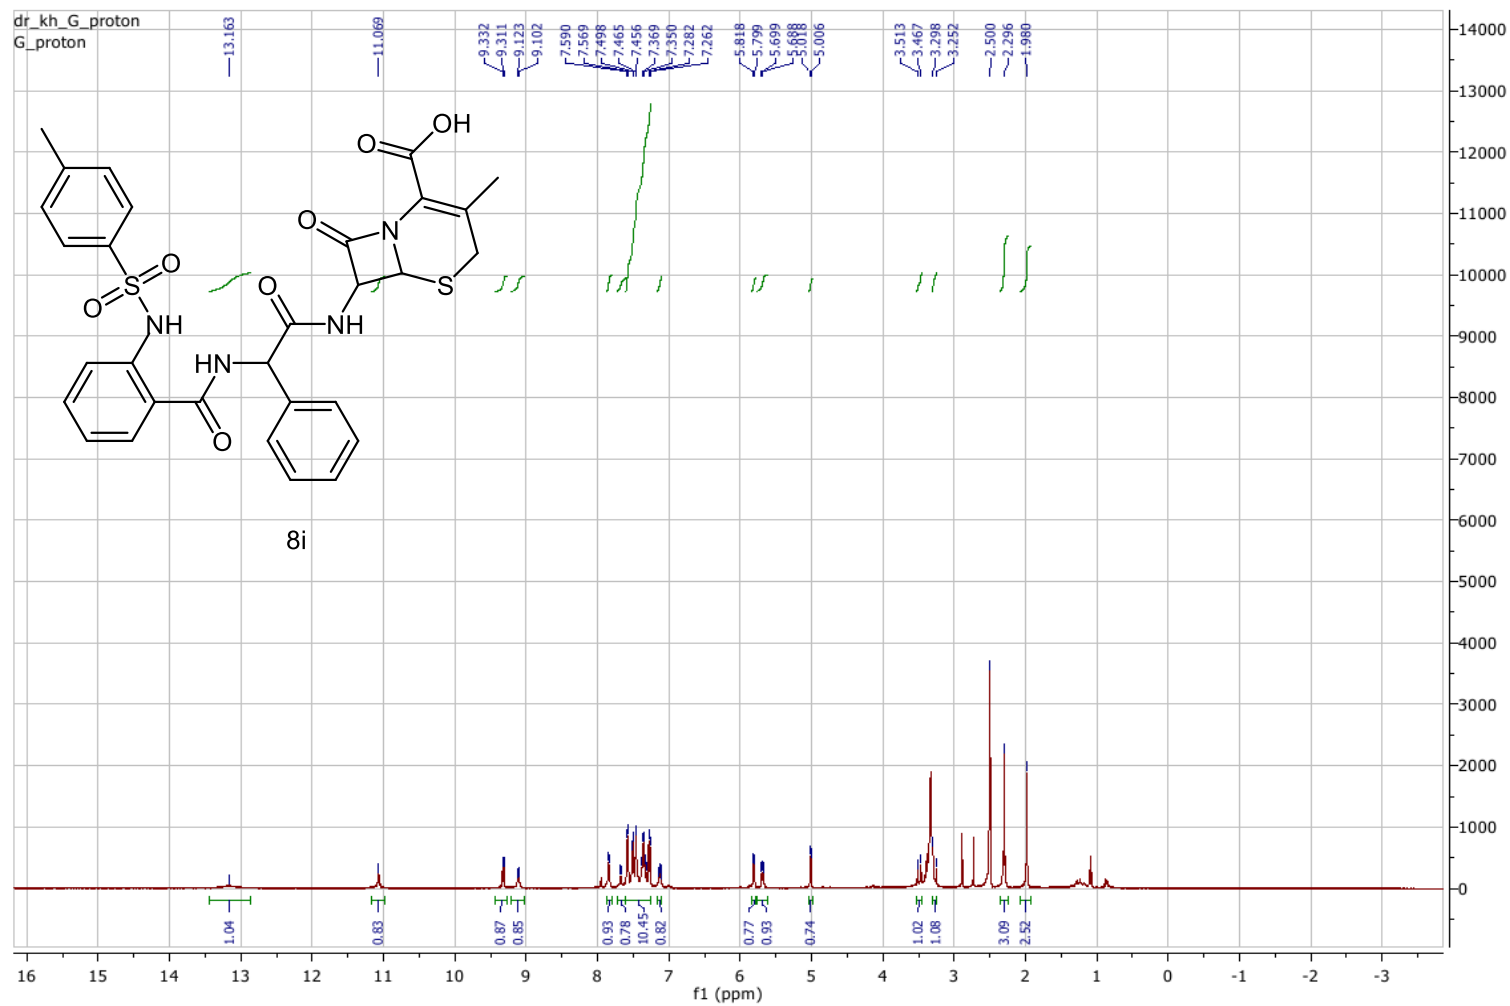

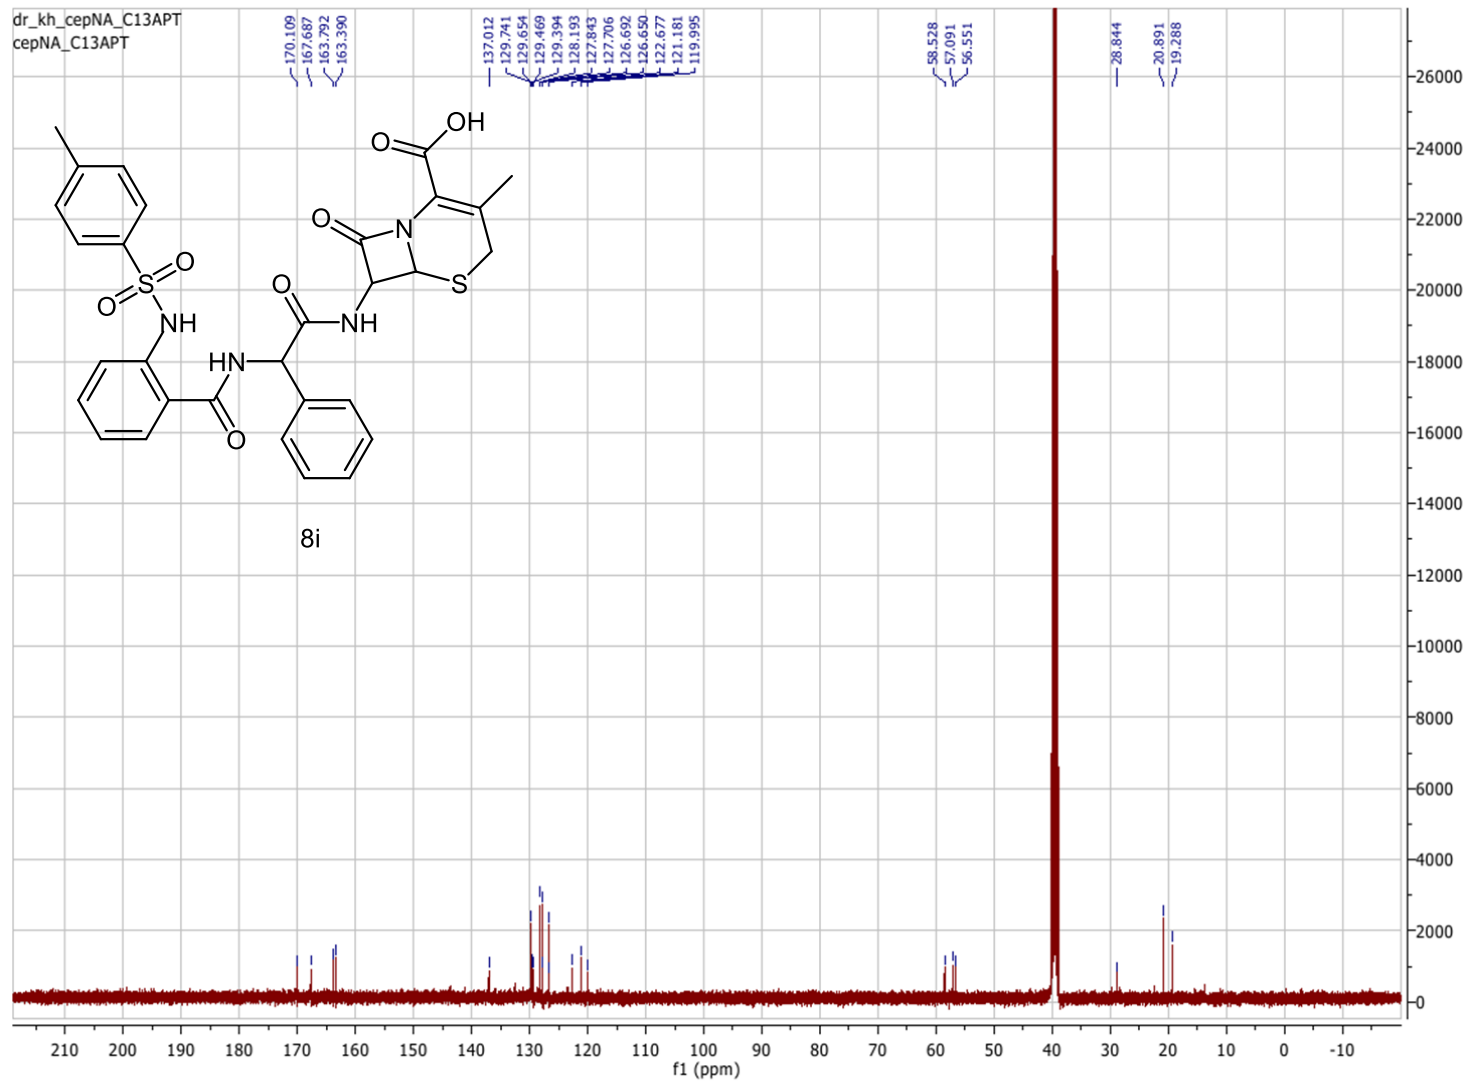

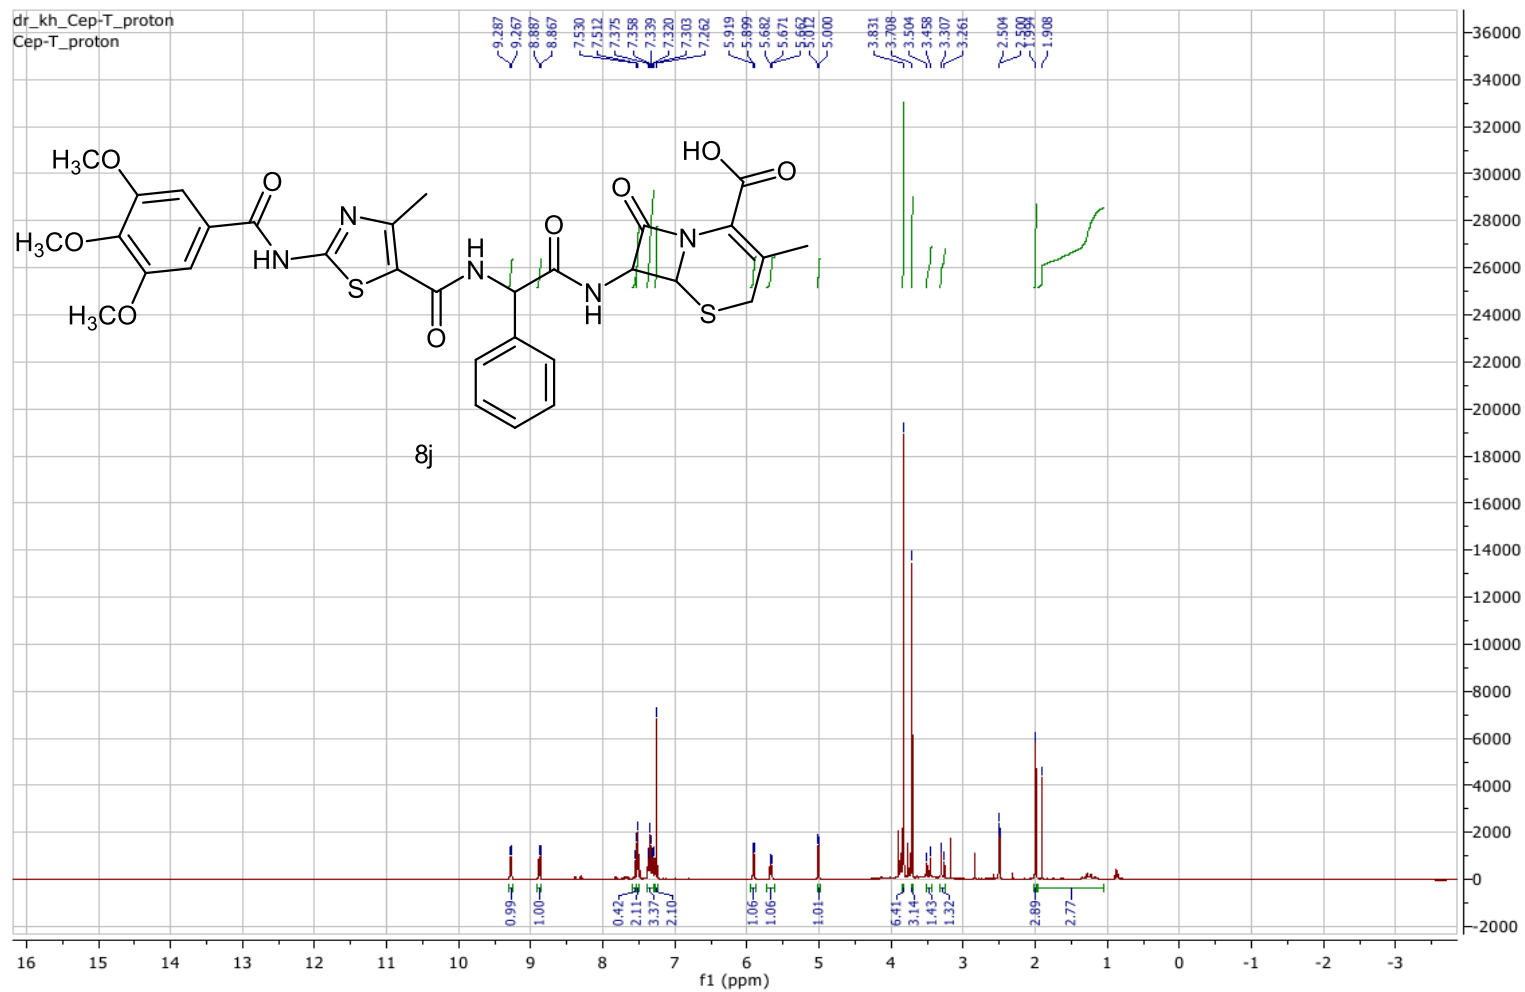

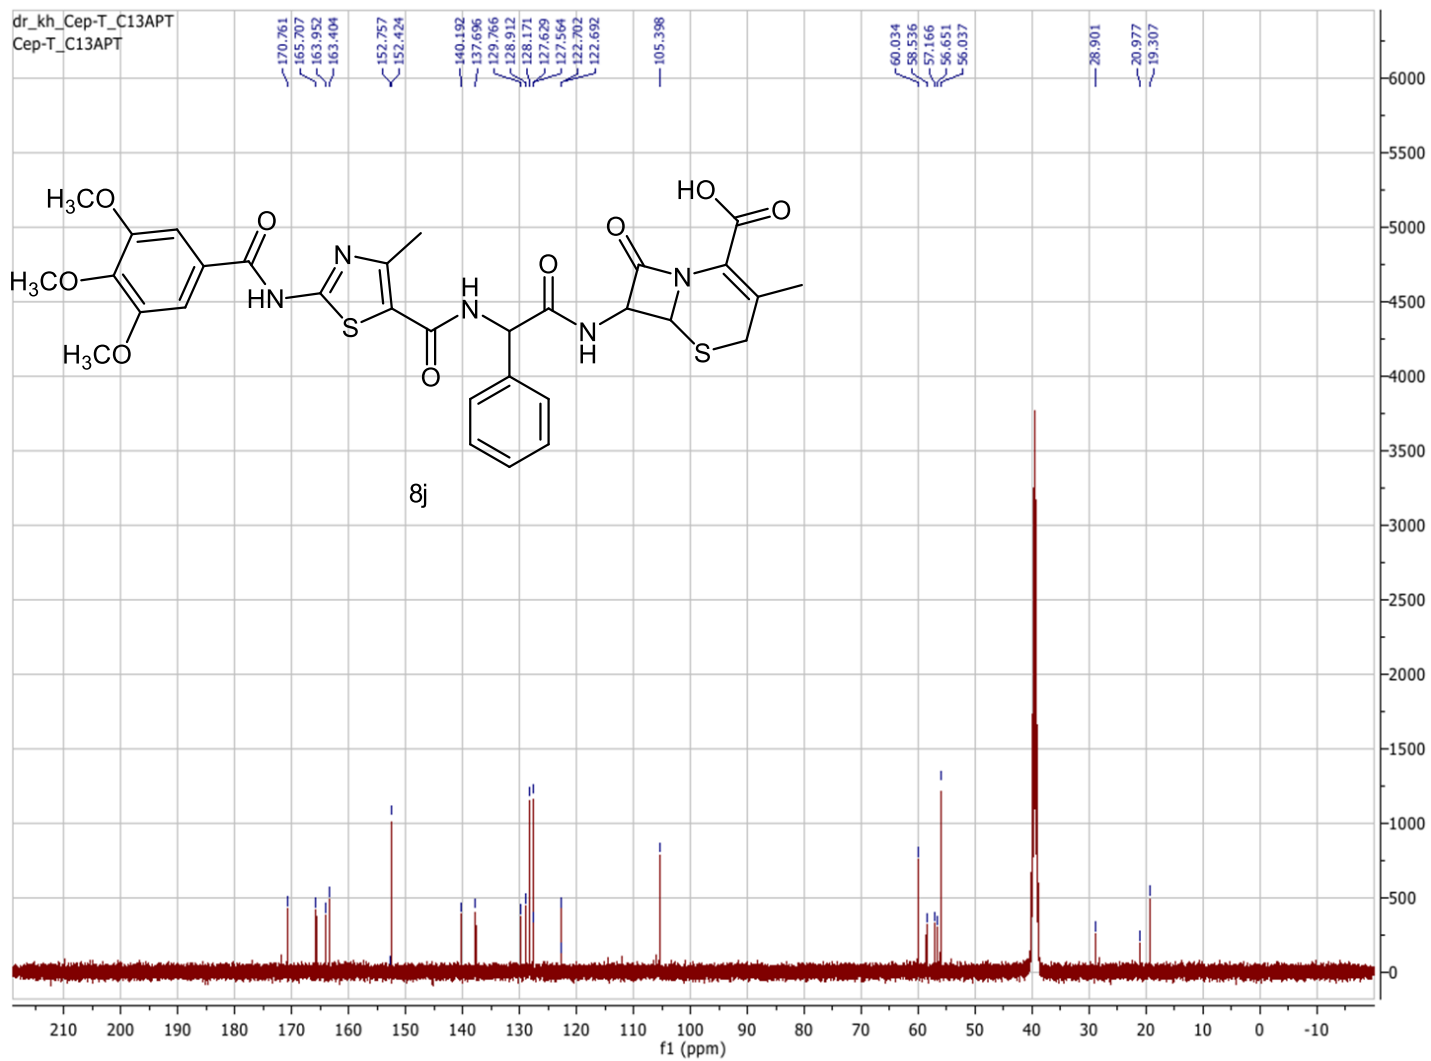

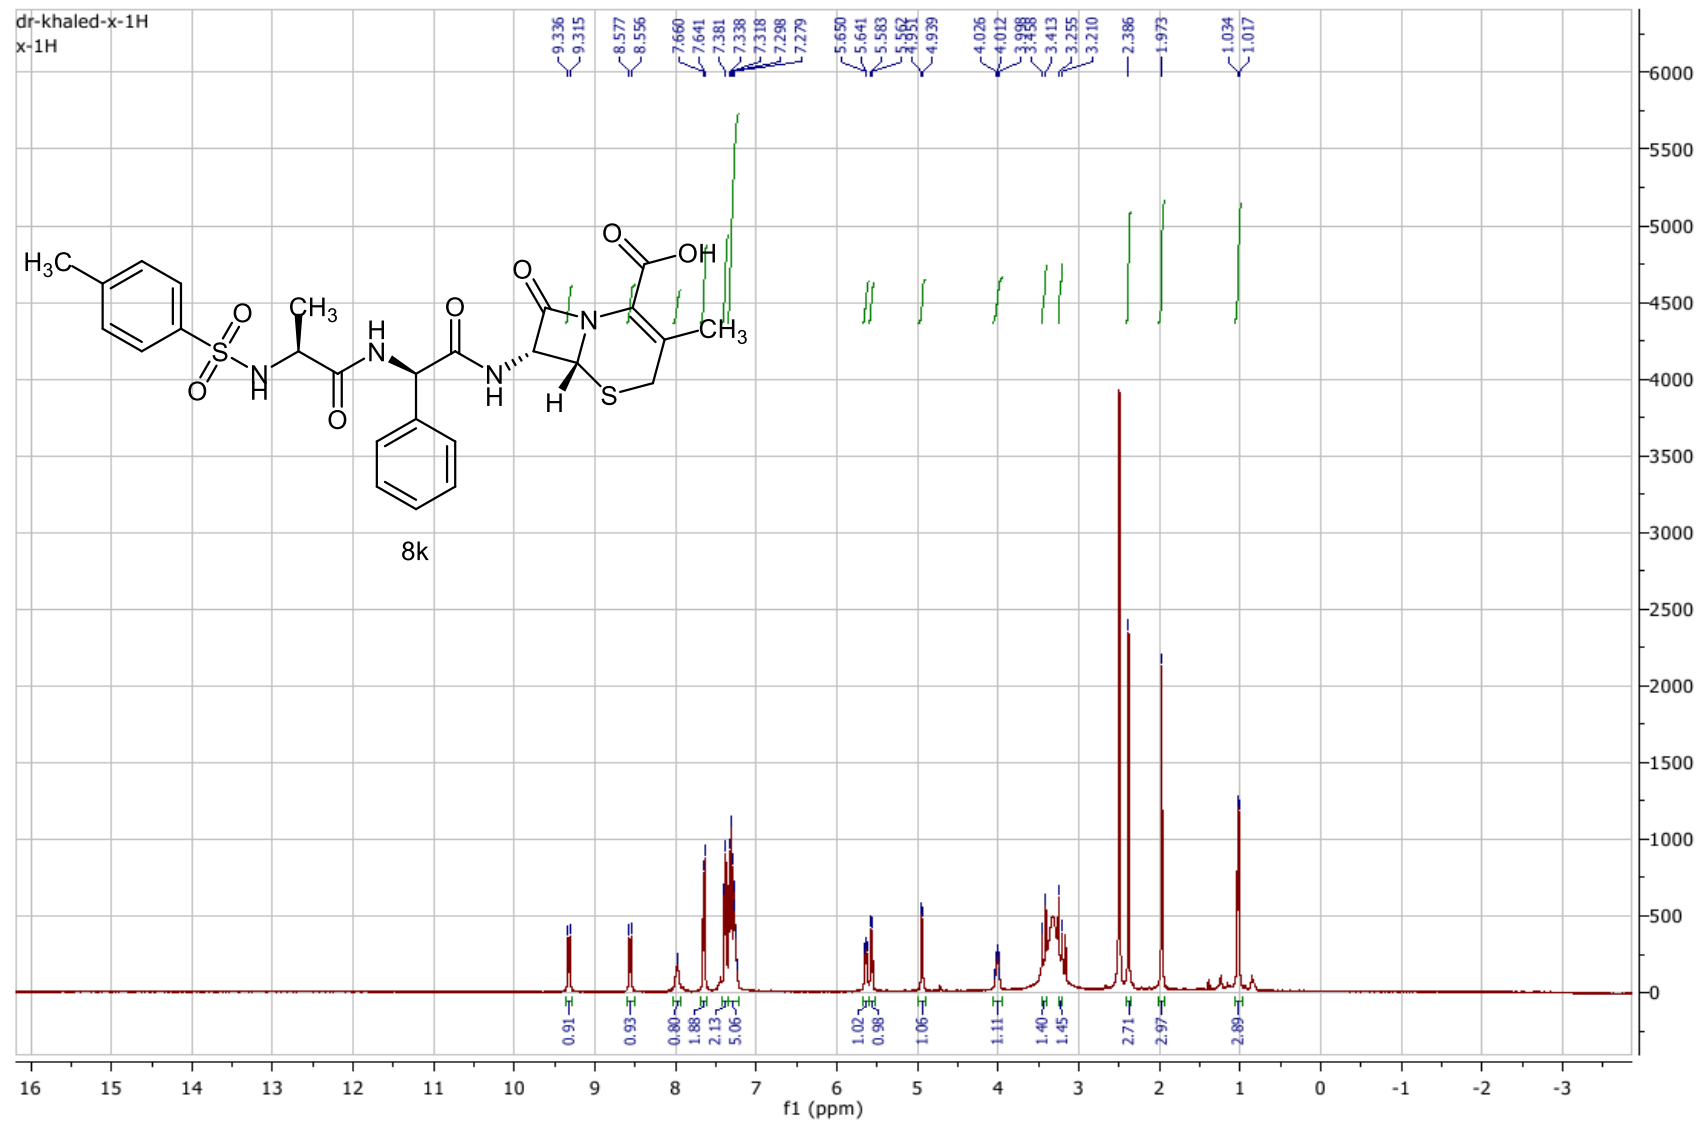

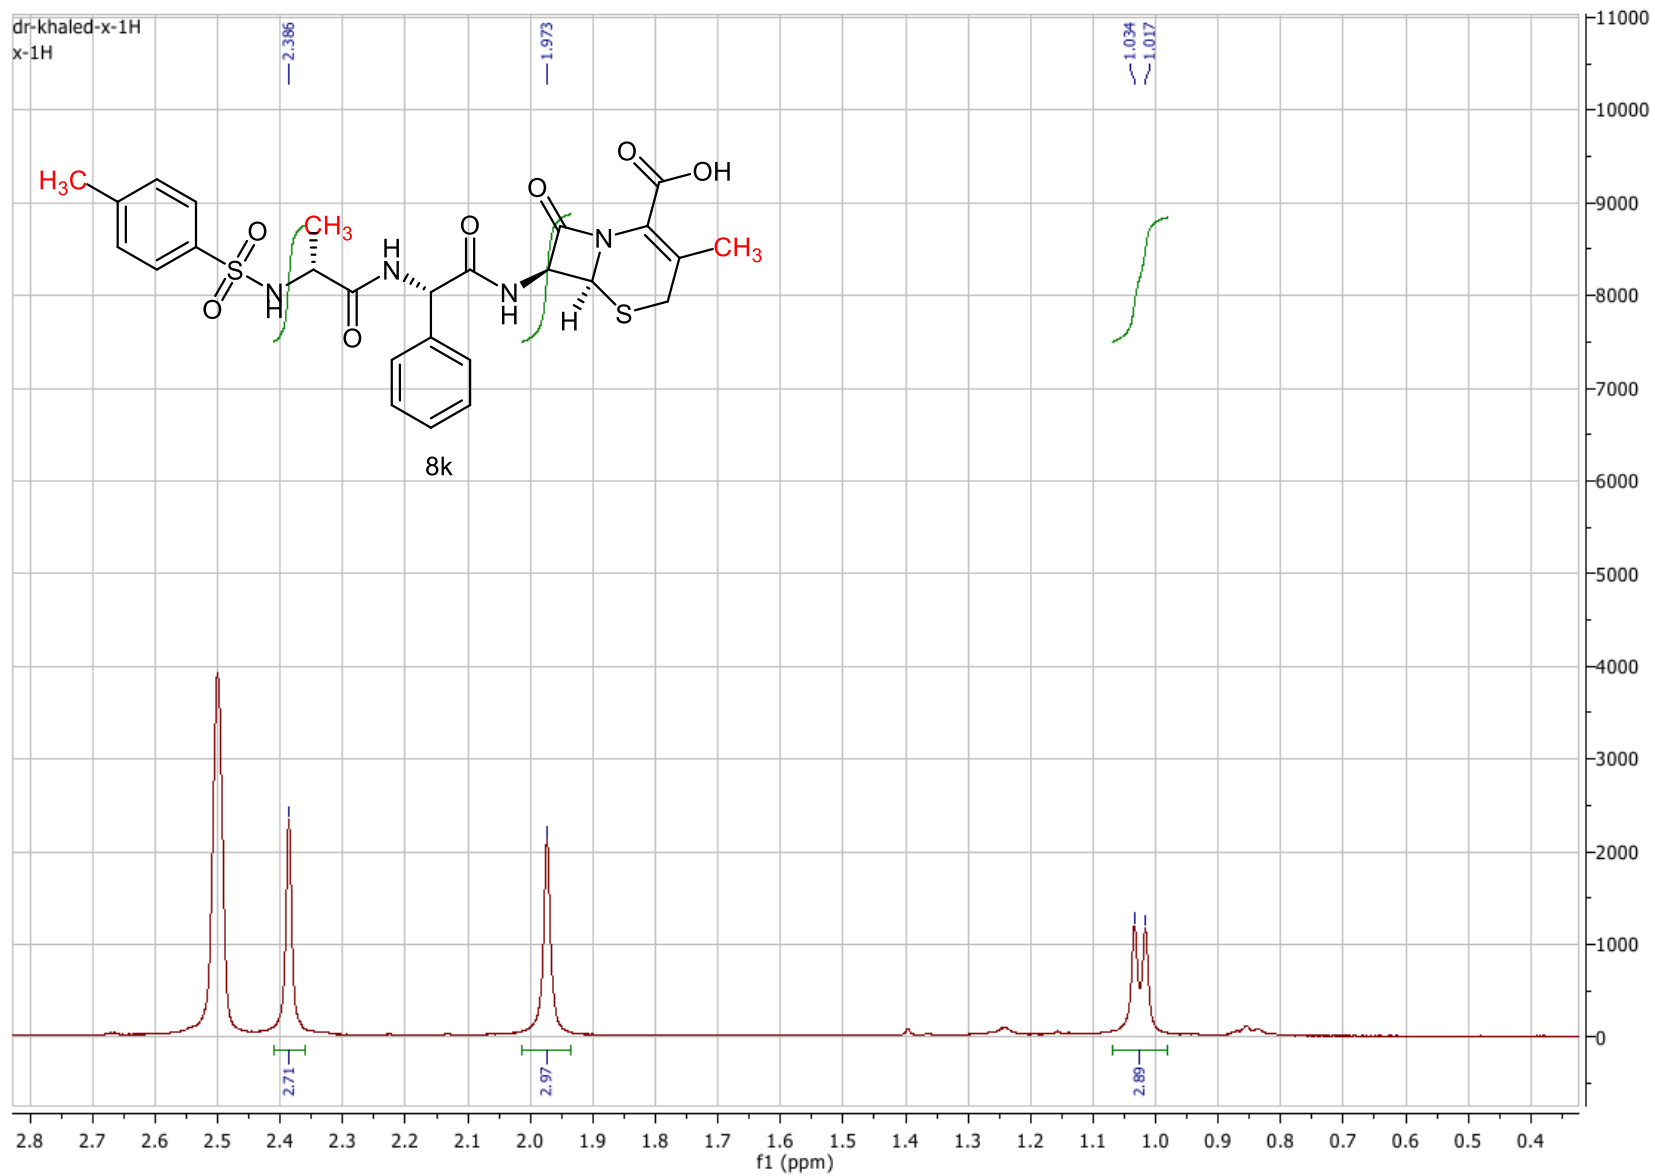

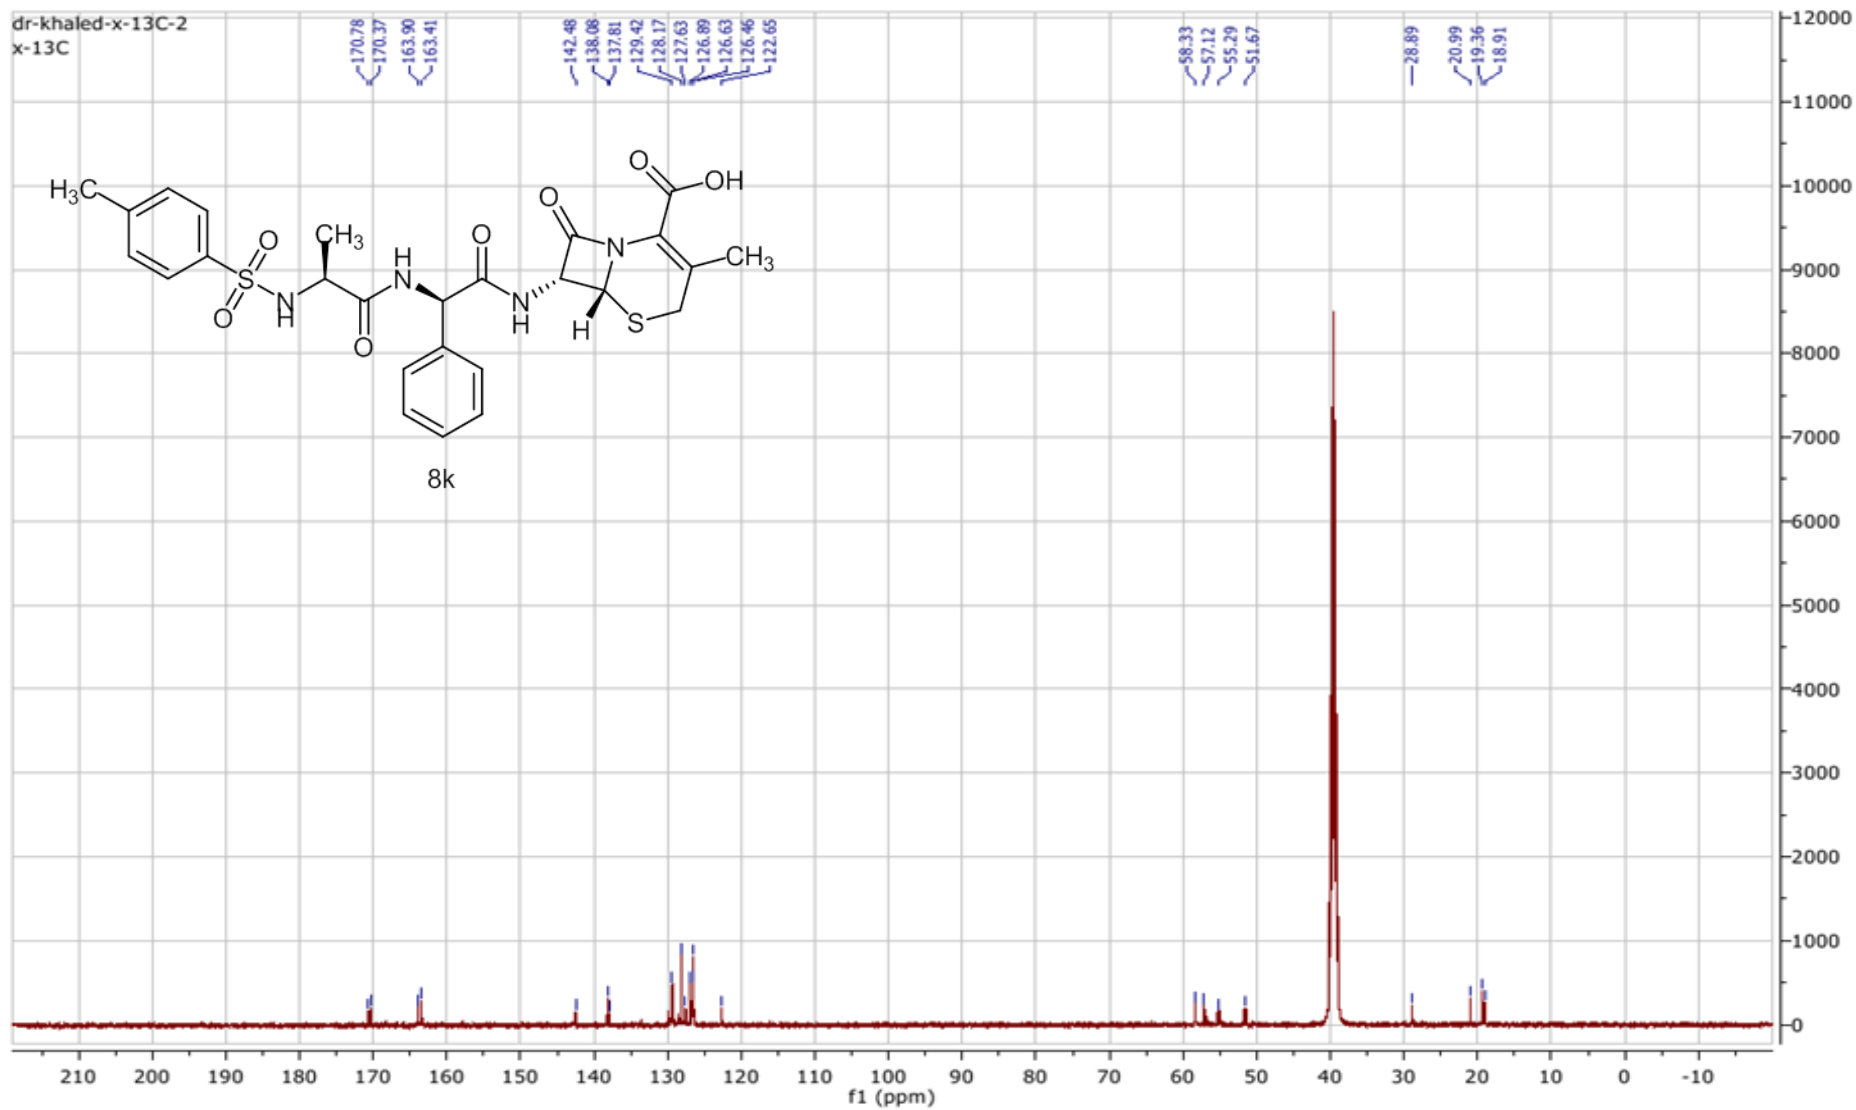



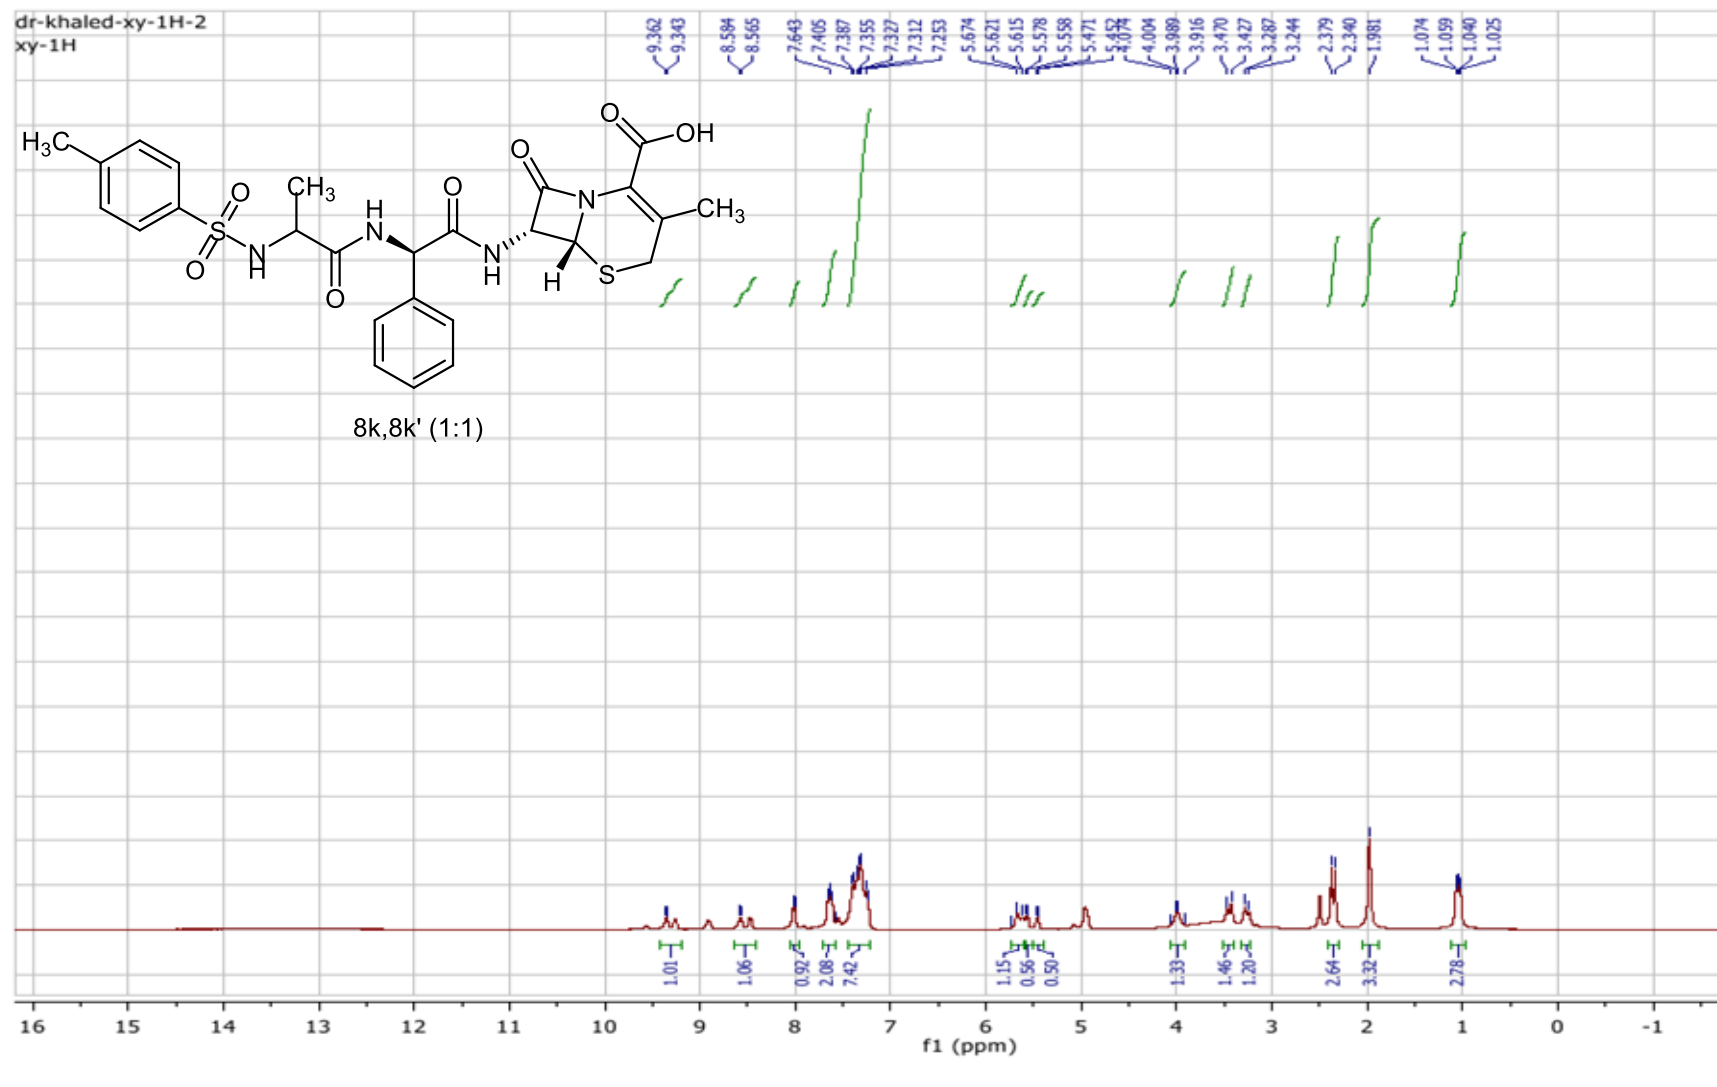

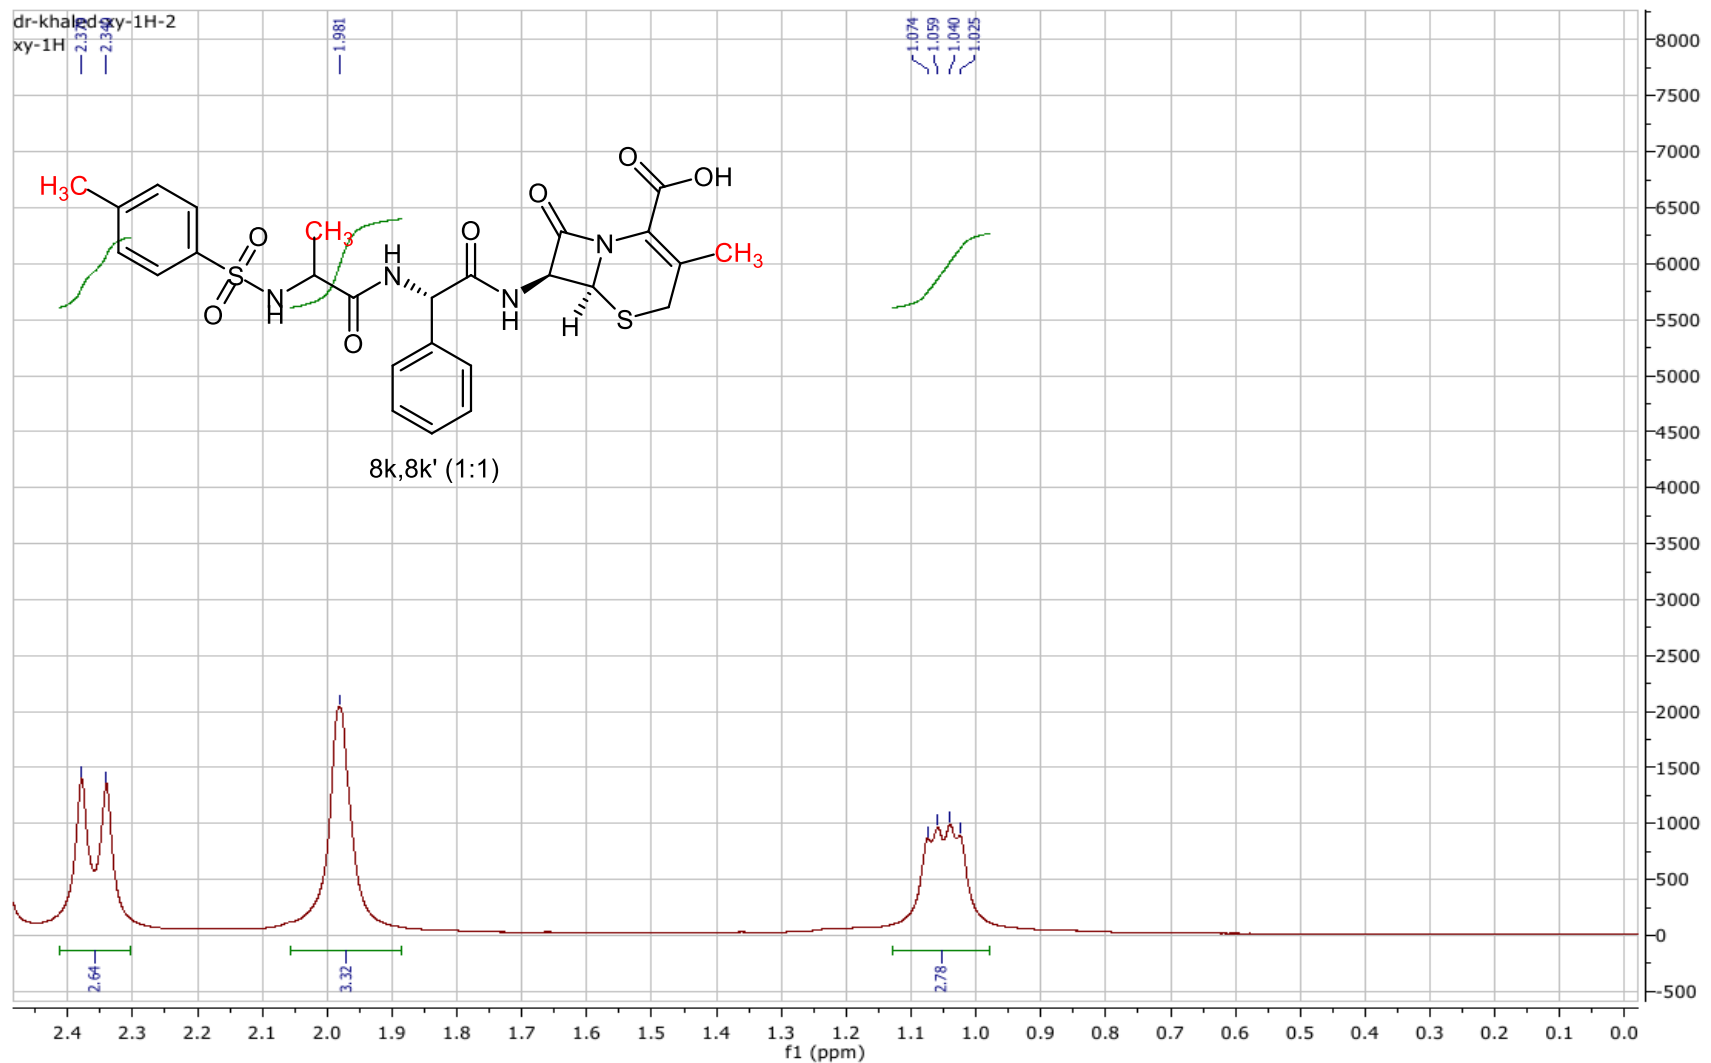

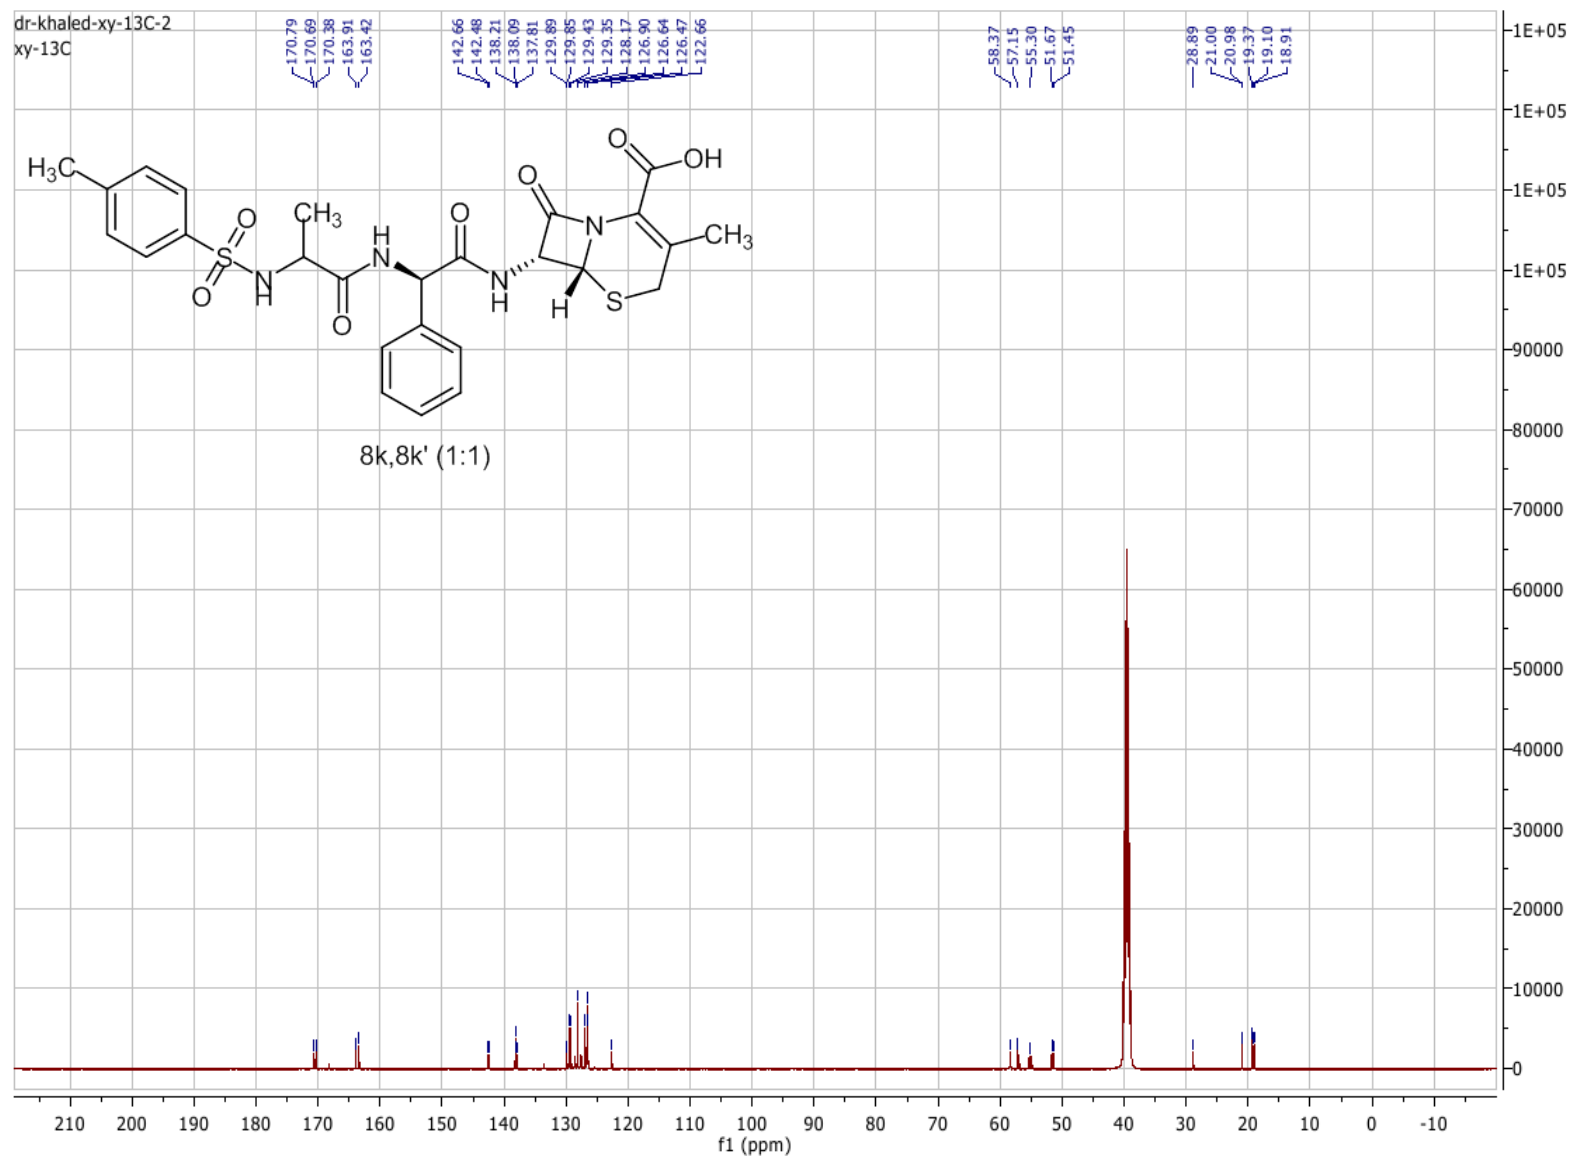

Supplement: scipharm-84-00484-s001.pdf [file scipharm-84-00484-s001.pdf]
